1 **Independent regulation of mtDNA quantity and quality resets the mitochondrial genome**  
2 **in *C. elegans* primordial germ cells**

3  
4 Aaron Z.A. Schwartz<sup>1,2</sup>, Nikita Tsyba<sup>3</sup>, Yusuff Abdu<sup>1,2</sup>, Maulik R. Patel<sup>3,4,5</sup> and Jeremy  
5 Nance<sup>1,2,\*</sup>  
6

7 <sup>1</sup>Department of Cell Biology, NYU Grossman School of Medicine, New York NY 10016

8 <sup>2</sup>Skirball Institute of Biomolecular Medicine, NYU Grossman School of Medicine, New York NY  
9 10016

10 <sup>3</sup>Department of Biological Sciences, Vanderbilt University, Nashville, TN 37232

11 <sup>4</sup>Department of Cell and Developmental Biology, Vanderbilt University School of Medicine,  
12 Nashville, TN 37232

13 <sup>5</sup>Diabetes Research and Training Center, Vanderbilt University School of Medicine, Nashville,  
14 TN 37232

15

16 \*Author for correspondence:                   Jeremy Nance  
17                                                            NYU Grossman School of Medicine  
18                                                            522 1<sup>st</sup> Avenue, Smilow 810  
19                                                            New York, NY 10016  
20                                                            212-263-3156  
21                                                            Jeremy.Nance@nyulangone.org  
22

23 **Abstract**

24 Mitochondria contain an independent genome, called mtDNA, which contains essential  
25 metabolic genes. Although mtDNA mutations occur at high frequency, they are inherited  
26 infrequently, indicating that germline mechanisms limit their accumulation. To determine how  
27 germline mtDNA is regulated, we examined the control of mtDNA quantity and quality in *C.*  
28 *elegans* primordial germ cells (PGCs). We show that PGCs generate a bottleneck in mtDNA  
29 number by segregating mitochondria into lobe-like protrusions that are cannibalized by  
30 adjacent cells, reducing mtDNA content two-fold. As PGCs exit quiescence and divide,  
31 mtDNAs replicate to maintain a set point of ~200 mtDNAs per germline stem cell. Whereas  
32 PGC lobe cannibalism eliminates mtDNAs stochastically, we show that the kinase PINK1,  
33 operating independently of Parkin and autophagy, preferentially reduces the fraction of mutant  
34 mtDNAs. Thus, PGCs employ parallel mechanisms to control both the quantity and quality of  
35 the founding population of germline mtDNAs.

36

37

38

39

40

41

42

43

44

45

46

47

48

## 49 **Introduction**

50 Mitochondria contain multiple copies of a small genome called mitochondrial DNA  
51 (mtDNA), which contains several genes essential for oxidative phosphorylation [1]. Compared  
52 to nuclear DNA, mtDNA has a high mutation rate and is repaired inefficiently [1]. mtDNAs  
53 containing deleterious mutations are found together with complementing wild-type mtDNAs in  
54 a state called heteroplasmy. Deleterious mtDNA mutations can lead to mitochondrial disease if  
55 present at sufficiently high heteroplasmy – a condition that is estimated to affect ~1 in 5000  
56 individuals and has no known cure [2].

57 mtDNA replicates independently from nuclear DNA and has a distinct mode of  
58 inheritance. During cell division in most cell types, each daughter cell inherits a stochastic  
59 subset of mitochondria and their mtDNAs. However, embryos inherit their mtDNAs exclusively  
60 from the pool present within the oocyte [3]. The strict maternal inheritance and high mutation  
61 rate of mtDNA raise a potential problem: mtDNA mutations could accumulate over  
62 generations, leading to mutational meltdown [4]. However, relatively few deleterious mutations  
63 are transmitted over generations [5], indicating that mtDNA mutations are selected against  
64 within the germ line.

65 Two mechanisms have been proposed to regulate germline mtDNA inheritance. In one  
66 mechanism – the mitochondrial bottleneck – mtDNAs are reduced in number within the  
67 germline lineage to create a small founding population, which is passed on to the next  
68 generation. Bottlenecks are theorized to allow for the stochastic enrichment or depletion of  
69 variant mtDNAs [3, 6, 7]. In vertebrates, a bottleneck occurs in embryonic primordial germ  
70 cells (PGCs) due to the dilution of maternally provided mtDNAs by reductive embryonic cell  
71 divisions, or via the replication of a subset of mtDNA genomes in PGCs [8-13]. It is not known  
72 whether germline mtDNA bottlenecks could form through other means.

73 Alternatively, mitochondria containing high levels of mutant mtDNAs can be eliminated  
74 directly from germ cells – a process called purifying selection [3]. The mechanistic basis for

75 germline purifying selection has been studied most intensively in the *Drosophila* ovary, where  
76 mtDNA mutations are eliminated both by autophagy and selective mtDNA replication [14-18].  
77 Although there is genetic evidence for purifying selection in many species, including humans  
78 [10], it is unknown whether it occurs through the mechanisms identified in flies or if alternative  
79 mechanisms for purging mutant germline mtDNAs exist.

## 80 **Results**

### 81 ***PGCs eliminate mitochondria through intercellular cannibalism***

82 To identify additional mechanisms of germline mtDNA control, we investigated how  
83 mtDNA quantity and quality are regulated in *C. elegans* PGCs. The entire *C. elegans* germ line  
84 descends from two PGCs, which remain quiescent during embryogenesis [19]. Although  
85 embryonic PGCs do not divide, they undergo a non-mitotic cellular remodeling process,  
86 discarding much of their cell mass and content. PGC remodeling occurs when PGCs form  
87 organelle-filled lobe-like protrusions, which adjacent endodermal cells cannibalize and digest  
88 (Fig. 1a) [20, 21]. Previously, we showed that PGCs lose much of their mitochondrial mass in  
89 the process of lobe cannibalism, suggesting that one role for this remodeling event could be to  
90 eliminate PGC mitochondria in bulk [20]. As such, lobe cannibalism might provide a novel  
91 mechanism for PGCs to adjust their mtDNA quantity and/or quality.

92 To begin to test this hypothesis, we used PGC-specific markers of the plasma  
93 membrane ( $\text{PH}_{\text{PLC1}\beta 1}::\text{mCherry}$ , 'Mem-mCh<sup>PGC</sup>') and mitochondrial outer membrane (TOMM-  
94  $20^{1-54}::\text{Dendra2}$ , 'Mito-Dendra<sup>PGC</sup>') to follow the distribution of PGC mitochondria during lobe  
95 formation and cannibalization in living embryos. Most PGC mitochondria moved into lobes  
96 shortly after they formed (Fig. 1b,c), but a subset returned to the cell body prior to lobe  
97 digestion (Fig 1d, S1a-c). Cell body mitochondria that are retained in L1 PGCs (Fig. 1e)  
98 represent the founding population present at the onset of larval germline expansion.

99 PGC lobe fragments present within endodermal cells co-localize with the lysosomal  
100 marker LAMP-1, suggesting that mitochondria within lobes are targeted for destruction and

101 digested [20]. To test this hypothesis more directly, we labeled the mitochondrial outer  
102 membrane with Dendra2 ('Mito-Dendra<sup>PGC</sup>'), which is pH-sensitive [22] and should be  
103 quenched when mitochondria are present within lysosomes. In L1 larvae, Mito-Dendra<sup>PGC</sup>  
104 fluorescence was greatly reduced in cannibalized lobe mitochondria compared to pH-  
105 insensitive Mito-mCh<sup>PGC</sup> [23] (arrowheads, Fig. 1f-g), whereas both markers labeled PGC cell  
106 body mitochondria robustly (dashed outline, Fig. 1f-g). We conclude that PGC lobe  
107 mitochondria are digested by endodermal cells shortly after lobes are cannibalized,  
108 permanently removing them from the mitochondrial pool passed on to L1 larval PGCs.

109

### 110 ***Lobe cannibalism halves the number of PGC mtDNAs***

111 To determine how elimination of mitochondria by lobe cannibalism affects the pool of  
112 germline mtDNAs, we first examined PGC mtDNAs visually. Mitochondrial transcription factor-  
113 A (TFAM), a component of the mtDNA nucleoid, is a well-characterized marker of mtDNA [24-  
114 26]. In human cells, individual TFAM nucleoids appear as puncta within the mitochondrial  
115 matrix and contain single, or at most a few, mtDNA genomes [27, 28]. We tagged the *C.*  
116 *elegans* TFAM homolog (*hmg-5*) endogenously with *gfp*. TFAM-GFP protein was expressed  
117 ubiquitously and formed puncta that localized to mitochondria, consistent with its known  
118 binding to mtDNA in *C. elegans* (Fig. S2a-b) [29]. Within PGCs, TFAM-GFP puncta were  
119 present in both cell body and lobe mitochondria, including those that had been recently  
120 cannibalized (arrowhead, Fig. 1h). The number of TFAM-GFP foci decreased more than two-  
121 fold between embryogenesis and the L1 larval stage (Fig. 1i-k), suggesting that lobe  
122 cannibalism results in a substantial loss of PGC mtDNAs.

123 To quantify the number of mtDNAs within PGCs, we developed a fluorescence activated  
124 cell sorting (FACS) protocol to purify GFP-labeled PGCs from either dissociated embryos or L1  
125 larvae, which we paired with droplet digital PCR (ddPCR) to count mtDNA molecules per cell  
126 (Figs. 2a, S3a-d,g-h). We were able to isolate nearly pure populations of PGCs at both stages

127 as determined by live imaging (Fig. S3e) and post-sort analysis (embryo: 98.0% +/- 0.5 pure;  
128 L1: 97.5% +/- 2.7 pure). Additionally, PGCs isolated from L1 larvae were less than half the  
129 volume of embryonic PGCs (Fig. S3e-f), indicating that lobe cannibalism had not yet initiated in  
130 most of the sorted embryonic PGCs and was complete in L1 PGCs, as expected [20].

131 We determined that each embryonic PGC contained 401 +/- 11 mtDNAs (Fig. 2b),  
132 which is 1.2% of the number of mtDNAs we detected in whole early embryos (33,875 +/- 1819)  
133 (Fig. S2c). The volume of each PGC *in vivo* ( $275 \pm 7.5 \mu\text{m}^3$ ) is 1.2% of the volume of whole  
134 embryos ( $23,949 \pm 175 \mu\text{m}^3$ ), suggesting that PGCs inherit their mtDNAs from the pool  
135 present at fertilization through reductive embryonic cell divisions and that little or no mtDNA  
136 replication occurs prior to their birth. By contrast, L1 larval PGCs contained only 220 +/- 12  
137 mtDNAs (Fig. 2b). The presence of fewer mtDNAs in L1 PGCs is consistent with our TFAM-  
138 GFP observations and suggests that PGC lobe cannibalism could eliminate nearly half of the  
139 mtDNA molecules that each PGC inherits at its birth (Fig. 2f).

140 To directly test whether lobe cannibalism causes the loss of mtDNAs that occurs within  
141 PGCs between embryonic and L1 stages, we examined PGC mtDNA number in *nop-1*  
142 mutants, in which most PGCs fail to form lobes (Fig. 2c,d) [30]. *nop-1* mutant L1 PGCs  
143 retained a significantly higher proportion of embryonic PGC mtDNAs compared to wild type  
144 (Fig. 2b,f). This finding implicates lobe cannibalism in the two-fold reduction in mtDNA that  
145 occurs as PGCs transition from embryogenesis to the L1 stage.

146 Lobe cannibalism could reduce the number of mtDNAs to a fixed number, or  
147 alternatively, eliminate a fixed proportion of the mtDNAs present within PGCs regardless of  
148 how many are present. To distinguish between these possibilities, we took advantage of the  
149 fact that changing TFAM activity can alter mtDNA copy number [31, 32]. Indeed, we found that  
150 whole embryos from the *TFAM-GFP* knock-in strain contained significantly fewer mtDNAs  
151 (8630 +/- 662) than wild type (Fig. S2c), indicating that the GFP tag partially interferes with  
152 TFAM function. Using the *TFAM-GFP* strain, we asked how many mtDNAs PGCs eliminate

153 during lobe cannibalism if they are born with a reduced number. *TFAM-GFP* embryonic PGCs  
154 contained 94 +/- 5 mtDNAs (Fig. 2e) and *TFAM-GFP* L1 PGCs contained 56 +/- 2 mtDNAs  
155 (Fig. 2e). Thus, despite the presence of markedly fewer mtDNAs in the *TFAM-GFP* strain, L1  
156 PGCs still inherit a comparable percentage of the mtDNAs contained within embryonic PGCs  
157 (wild-type: 55%, *TFAM-GFP*: 60%) (Fig. 2f). These data indicate that lobe cannibalism does  
158 not subtract the number of PGC mtDNAs to a defined number, but rather divides the  
159 population of PGC mtDNAs present by a fixed proportion.

160

161 ***Lobe cannibalism creates a bottleneck and establishes an mtDNA set point in germline***  
162 ***stem cells***

163 Our results so far suggest that lobe cannibalism could create a germline mtDNA  
164 bottleneck by halving the number of PGC mtDNAs. However, if the initial cycles of larval  
165 germline proliferation proceed in the absence of mtDNA replication, the number of mtDNAs per  
166 germ cell would continue to drop and the bottleneck would occur at a later stage of germline  
167 development. When L1 larvae first encounter food, PGCs exit from quiescence and begin to  
168 proliferate, forming a population of undifferentiated germline stem cells (GSCs) [19, 33]. It is  
169 not known whether germline mtDNA replication has begun at this stage. Previous qPCR  
170 experiments on whole worms first revealed a significant expansion of germline mtDNAs after  
171 the L3 larval stage [34, 35]. However, these experiments may have lacked the resolution to  
172 detect an increase in mtDNAs were it to occur within the relatively small number of GSCs  
173 present in whole L1 larvae.

174 To determine if mtDNAs replicate as L1 PGCs exit quiescence and divide to produce  
175 GSCs, we quantified TFAM foci as PGCs in fed L1s began to proliferate as GSCs. To  
176 circumvent the mtDNA replication defects that we noted in *TFAM-GFP* worms, we tagged  
177 *TFAM* (*hmg-5*) endogenously with a much smaller tag, *gfp(11)* [36, 37]. To visualize TFAM-  
178 GFP(11), we expressed a mitochondrially targeted, PGC-specific GFP(1-10) [Mito-GFP(1-



179 10)<sup>PGC</sup>]. GFP(1-10) alone was minimally fluorescent, but upon binding to GFP(11) formed a  
180 functional fluorophore (Fig. S4a,b). Within PGCs, TFAM-GFP(11) showed an identical  
181 localization pattern to TFAM-GFP in PGCs (Fig. 3a,b), and did not cause significant defects in  
182 mtDNA copy number (Fig. S4c). Larvae fed beginning at the L1 stage showed a progressive  
183 increase in the number of TFAM-GFP(11) foci per germ line (Fig. 3c-f, compare to 3b). TFAM-  
184 GFP(11) foci numbers began to increase even before the first division of the PGCs was  
185 complete (early L1, Fig. 3c,g), and continued to expand through the L2 stage (an average of  
186 22 GSCs), when we stopped our analysis (Fig. 3f,g). In contrast to the increasing number of  
187 TFAM-GFP(11) foci per *germ line* over this period, the number of foci per *germ cell* remained  
188 constant after a transient spike in early L1s (2 cells), and stabilized at a number of foci similar  
189 to that of L1 that had not been fed (Fig. 3h).

190 To complement these experiments, we sorted GSCs (Fig. S5) from fed L1 larvae  
191 (containing an average of 4 GSCs) and L2 larvae (containing an average of 18 GSCs), and  
192 counted the number of mtDNA molecules per GSC. Consistent with our TFAM-GFP(11)  
193 observations, the number of mtDNAs per germ line increased over this period (Fig. 3i),  
194 although the number of mtDNAs per GSC remained constant, and similar to that in starved L1s  
195 (~200) (Fig. 3j). Together, these results indicate that mtDNAs replicate as L1 PGCs begin to  
196 divide to form GSCs, and thereafter balance mtDNA replication with cell division to maintain a  
197 constant number of mtDNAs per GSC, through at least the L2 stage.

198 The observation that GSCs contain the same number of mtDNAs as L1 PGCs suggests  
199 that lobe cannibalism might function to reduce PGC mtDNA numbers to an optimal level. To  
200 explore this hypothesis, we examined mtDNA number in GSCs of *nop-1* mutants, since we  
201 found that *nop-1* L1 PGCs contain excess mtDNAs. Remarkably, *nop-1* GSCs isolated from L2  
202 larvae contained a similar number of mtDNAs (182 +/- 38) as did wild-type GSCs (215 +/- 25)  
203 (Fig. 3k,l). These results suggest that GSCs actively regulate mtDNA replication to maintain  
204 ~200 mtDNAs per cell, even if excess mtDNAs are present at the onset of germline expansion.



205

206 ***Purifying selection reduces mutant mtDNA heteroplasmy in PGCs independently of lobe***  
207 ***cannibalism***

208 Our experiments so far have not addressed whether lobe cannibalism eliminates  
209 mitochondria indiscriminately, or alternatively, if poorly functioning mitochondria, containing  
210 high levels of mutant mtDNA, are preferentially targeted to lobes for destruction. To examine  
211 this question, we investigated PGCs containing the *uaDf5* mtDNA deletion. *uaDf5* removes 3.1  
212 kb of the mitochondrial genome, including several essential genes (Fig. 4a), and therefore can  
213 exist only when in heteroplasmy with wild-type mtDNA [38]. However, *uaDf5* persists stably  
214 because it is preferentially replicated compared to wild-type mtDNA ([29, 39-41]. Our  
215 experiments above suggest that there is little or no mtDNA replication occurring in PGCs,  
216 potentially providing an opportunity for purifying selection to reduce *uaDf5* levels before larval  
217 germline expansion begins.

218 First, we measured *uaDf5* heteroplasmy in whole embryos, embryonic PGCs, and L1  
219 PGCs, as well as in GSCs of fed larvae (Fig. 4b, S6). *uaDf5* occurred at 48% +/- 0.3  
220 heteroplasmy in embryonic PGCs, which was nearly identical to its heteroplasmy in whole  
221 embryos (Fig. 4b), suggesting that there is not strong selection against *uaDf5* during  
222 embryogenesis prior to PGC birth. However, in L1 PGCs, *uaDf5* heteroplasmy dropped by  
223 4.5% (Fig. 4b). This effect was not specific to *uaDf5*, as PGC heteroplasmy of the 1.5kb  
224 *mptDf2* deletion was also reduced between embryogenesis and the L1 stage (Fig. S6). Within  
225 starved L1 PGCs, *uaDf5* was present at 43.5% +/- 0.5 heteroplasmy, and was maintained at a  
226 similar level after the PGCs divided once to form 4 GSCs (mid-L1 stage). However, by the L2  
227 stage (average of 20 GSCs), *uaDf5* heteroplasmy increased to 53% +/- 1.7 - a level nearly  
228 identical to that of whole adult worms (Fig. 4b). These findings suggest that PGCs utilize  
229 purifying selection to reduce levels of mutant mtDNAs at a stage when they cannot take  
230 advantage of mtDNA replication to expand selfishly within the germ line. However, once

231 mtDNA replication begins in larval GSCs, the frequency of mutant mtDNAs can once again  
232 rise.

233 To test whether lobe cannibalism is responsible for purifying selection against *uaDf5* in  
234 PGCs, we examined *uaDf5* heteroplasmy in *nop-1* mutant PGCs. Similar to wild type, *uaDf5*  
235 PGCs reduced their total mtDNA content ~two-fold as a result of lobe removal, and as  
236 expected, *nop-1; uaDf5* PGCs failed to reduce their mtDNA (Fig. 4c). Surprisingly, we found  
237 that in *nop-1; uaDf5* mutants, *uaDf5* heteroplasmy still decreased from embryonic PGCs to L1  
238 PGCs (Fig. 4d,e). We conclude that lobe cannibalism is not responsible for the reduction in  
239 *uaDf5* heteroplasmy within PGCs, implicating an alternative pathway in PGC mtDNA purifying  
240 selection.

241

#### 242 ***Autophagy eliminates a subset of PGC mitochondria non-selectively***

243 Cells can use autophagy to remove damaged cellular components and organelles,  
244 including mitochondria. During autophagy, an autophagosome membrane encapsulates  
245 organelles and cytoplasm, subsequently fusing with a lysosome to degrade its contents [42].  
246 To address whether mtDNA purifying selection in PGCs might be mediated by autophagy, we  
247 first used the pH-discriminating Mito-mCh<sup>PGC</sup> and Mito-Dendra<sup>PGC</sup> reporters to observe  
248 whether any PGC mitochondria become acidified before lobe cannibalism occurs. In the  
249 majority of *uaDf5* embryos, we observed one or more large, distinct foci of acidified  
250 mitochondria [mCherry(+) Dendra(-)] within PGCs prior to lobe cannibalism (Fig. 5a,c).  
251 Acidified foci were completely absent in *atg-18/WIP12; uaDf5* null mutant embryos (Fig. 5b,c),  
252 in which autophagy is blocked at the autophagosome membrane nucleation step [43],  
253 suggesting that the acidified foci are PGC mitochondria that are eliminated by autophagy.

254 To test whether autophagy preferentially removes *uaDf5* mtDNAs in PGCs, we sorted  
255 embryonic and L1 PGCs in *uaDf5* mutants with putative null mutations in *atg-18* and *atg-13*,  
256 which blocks autophagy at an earlier initiation step [43, 44]. L1 PGCs in *atg-18* and *atg-13*

257 mutants had reduced numbers of total mtDNAs compared to embryonic PGCs, although a  
258 smaller percentage (*atg-18*: 25%, *atg-13*: 20%) of mtDNAs were eliminated compared to *uaDf5*  
259 alone (52%) (Fig. 5d,e). These findings suggest that the autophagy pathway acts in parallel  
260 with lobe cannibalism and is partially responsible for the reduction of mtDNAs in PGCs.  
261 Unexpectedly, in both *atg-13; uaDf5* and *atg-18; uaDf5* mutants, *uaDf5* heteroplasmy was still  
262 reduced in L1 PGCs compared to embryonic PGCs (Fig. 5f,g). We conclude that autophagy  
263 likely eliminates a subset of mitochondria and mtDNAs within PGCs non-selectively, but is not  
264 responsible for purifying selection against *uaDf5* mutant mtDNA. Consistent with this  
265 interpretation, wild-type embryonic PGCs contained foci of acidified mitochondria at  
266 comparable frequencies to *uaDf5* PGCs (Figs. 5c, S7).

267

### 268 ***PINK1* mediates autophagy-independent mtDNA purifying selection in PGCs**

269 The PINK1/Parkin signaling pathway, which consists of the mitochondrial kinase PINK1  
270 and its effector ubiquitin ligase Parkin, can recognize and mark defective mitochondria for  
271 destruction either via autophagy, or through autophagy-independent pathways [16, 45, 46]. To  
272 address whether homologs of PINK1 or Parkin are required for purifying selection of *uaDf5*, we  
273 examined *uaDf5* heteroplasmy in PGCs with putative null mutations in *pink-1/PINK1*, *pdr-*  
274 *1/Parkin*, and double mutants. As expected, single and double mutants had reduced mtDNA  
275 content in L1 PGCs compared to embryonic PGCs, although to a lesser extent than *uaDf5*  
276 controls (Fig. 6a,b). However, even though *uaDf5* heteroplasmy was markedly higher in all  
277 three backgrounds compared to *uaDf5* controls (see Discussion), only *pink-1*, and *pink-1; pdr-*  
278 *1* double mutants, but not *pdr-1* single mutants, abrogated the reduction in *uaDf5*  
279 heteroplasmy between embryonic and L1 PGCs (Fig. 6c-d). Taken together, these findings  
280 indicate that PINK1 alone, acting independently of Parkin, is required for autophagy-  
281 independent purifying selection against mutant mtDNAs within *C. elegans* PGCs.

## 282 Discussion

283 Our findings show that *C. elegans* PGCs actively regulate both mtDNA quantity and  
284 quality, but do so through independent and parallel mechanisms (Fig. 6e). The cannibalism of  
285 PGC lobes creates a bottleneck and mtDNA setpoint, whereas PINK1 preferentially reduces  
286 mutant mtDNA heteroplasmy. We propose that this combined regulation optimizes the  
287 founding population of mitochondria before expansion and differentiation of the germ line.

288 Elimination of mitochondria through intercellular cannibalism provides a previously  
289 undescribed mechanism for bottleneck formation. We postulate that embryonic PGCs inherit  
290 excess maternal mtDNAs, as they are born from relatively few embryonic cell divisions [21],  
291 and lobe cannibalism halves PGC mtDNA copy number to establish a level that is maintained  
292 in GSCs as mtDNA replication ensues. Having ~200 mtDNAs per PGC appears to be  
293 important, as even when L1 PGCs inherit an excess of mtDNAs in *nop-1* mutants, mtDNA  
294 copy number quickly resets to ~200 shortly after PGCs differentiate into proliferating GSCs.  
295 These findings indicate that GSCs balance mtDNA replication with cell division to reach an  
296 mtDNA set point of ~200 that is actively maintained. It is possible that this number of mtDNAs  
297 is needed for sufficient selection against deleterious mtDNA mutations, minimizes damaging  
298 free radical production [20], or is optimal for balancing mitochondrial function with germ cell  
299 size and physiology.

300 Whereas PGC lobe cannibalism produces a stochastic reduction in mtDNA number, we  
301 found that PINK1 specifically reduces the fraction of mutant mtDNAs in PGCs. While the effect  
302 of PINK1-mediated selection against *uaDf5* is moderate, even small decreases in  
303 heteroplasmy could potentially have important evolutionary consequences. For example,  
304 individual selection events against *de novo* mtDNA mutations could eliminate them from the  
305 germ line permanently. In other systems, PINK1 can eliminate poorly functioning mitochondria  
306 by recruiting Parkin and inducing mitophagy [47]. However, we find no role for Parkin or  
307 autophagy in PGC mtDNA purifying selection, although non-selective autophagy is partially

308 responsible for reducing mtDNA number. Alternative mechanisms of mitochondrial elimination  
309 have been described in cultured mammalian cells, such as direct targeting to endolysosomes  
310 [45, 46]. It will be important in future studies to determine whether PINK1 operates in PGCs  
311 through one of these pathways or via a novel mechanism. It is worth noting that *uaDf5*  
312 heteroplasmy in embryonic PGCs is higher in *pink-1*, *pdr-1*, and autophagy mutants,  
313 suggesting that these pathways have roles in purifying selection during other stages of germ  
314 line development, as they do in somatic cells [48-50].

315 Purifying selection in *C. elegans* PGCs differs from mechanisms that operate in the  
316 *Drosophila* ovary, where mutant mtDNAs are eliminated through mitochondrial fission followed  
317 by autophagy, and mutant mtDNA replication is selectively inhibited by PINK1 [14-18].  
318 Although it is difficult to exclude the possibility that very small amounts of mtDNA replication  
319 occur in *C. elegans* PGCs, we do not detect robust mtDNA replication until PGCs differentiate  
320 into GSCs. This finding is also supported by our observation that *uaDf5* heteroplasmy  
321 decreases in PGCs, whereas *uaDf5* is known to selfishly expand through preferential mtDNA  
322 replication [29]. Indeed, we showed that as PGCs differentiate to GSCs, *uaDf5* heteroplasmy  
323 rapidly increases to levels found in the adult. Previous work has suggested that selection also  
324 occurs during *C. elegans* oogenesis, although the mechanism is unknown [40, 51]. It will be  
325 interesting to determine if these different means of achieving purifying selection are stage-  
326 specific (ovary versus PGC), or reveal that multiple mechanisms can be used toward the  
327 common goal of eliminating mutant mtDNA genomes from the germ line.

328

### 329 **Acknowledgements**

330 We thank the Caenorhabditis Genetics Center (CGC), Heng-Chi Lee (U. of Chicago) and  
331 Dustin Updike (MDI Biological Laboratory) for providing worm strains. The CGC is supported  
332 by the NIH Office of Research Infrastructure Programs (P40 OD010440). We thank members  
333 of the Nance laboratory, Florenal Joseph, and Melissa Pamula for comments on the

334 manuscript. We thank Peter Lopez, James Alvarado, Yulia Chupalova, and Sitharam  
335 Ramaswami for FACS/ddPCR assay development, and Michael Cammer for help with image  
336 analysis and acquisition. FACS was performed at the NYULMC Cytometry and Cell Sorting  
337 Laboratory; ddPCR was performed at the NYULMC Genome Technology Center; and  
338 Microscopy used instrumentation in the NYULMC Microscopy Laboratory, all of which are  
339 partially supported by the Laura and Isaac Perlmutter Cancer Center support grant  
340 P30CA016087 from the National Institutes of Health/National Cancer Institute. This work was  
341 supported by fellowships/training grants from the National Institutes of Health and NYSTEM to  
342 AZAS (NIH: F31HD102161, NYSTEM: C32560GG) and a research grant from the National  
343 Institutes of Health to JN (R35GM118081).

344

#### 345 **Author contributions**

346 AZAS and JN conceived the project. AZAS performed all experiments except creation of the  
347 Mito-Dendra<sup>PGC</sup> marker, which was made by YA. AZAS and JN analyzed and interpreted the  
348 data. NT and MP provided training in cell sorting and identified the *mptDf2* strain. AZAS and  
349 JN wrote the initial manuscript, and all authors edited the manuscript.

350

#### 351 **Methods**

##### 352 *Worm culture and strains*

353 Unless otherwise stated, all strains were maintained at 20°C on nematode growth  
354 medium plates seeded with *Escherichia coli* OP50 according to standard methods [52]. For  
355 egg isolation and L1 synchronization, semi-synchronized L1 larvae were outgrown on 10cm  
356 Enriched Peptone plates seeded with *E. coli* NA22. Gravid adults were then washed off and  
357 early stage embryos were isolated via worm bleaching. Isolated eggs were broken into two  
358 populations - one for immediate embryo dissociation and another which was allowed to hatch

359 overnight in M9 for L1 synchronization/dissociation. For L1 feeding experiments, synchronized  
360 L1 larvae were plated onto peptone plates and grown for 12 and 24 hrs at 20°C (for cell  
361 sorting), or for 6, 9, 12, and 24 hours at 23°C (for live imaging). A list of all strains  
362 used/generated in the study is available in [Supplementary Table 1](#).

363

#### 364 *PGC isolation and cell sorting*

365 Cell dissociation of early embryos and larvae was performed as described previously  
366 [53, 54] with slight modifications described in detail below.

367

#### 368 Embryonic cell dissociation

369 Purified embryos were pelleted at 3000g for 30 seconds in non-stick 1.5mL tubes,  
370 resuspended in 600µL chitinase (Sigma C6317) (2mg/mL) in conditioned-egg buffer (25 mM  
371 HEPES (Sigma H3375) pH 7.3, 118 mM NaCl, 48mM KCl, 2 mM CaCl<sub>2</sub>, 2 mM MgCl<sub>2</sub>,  
372 adjusted to mOsm 340±5 with ddH<sub>2</sub>O), hereafter referred to as egg buffer, and incubated on a  
373 rocking nutator for 15 minutes at room temperature. After 15 minutes, 800µL of cold egg buffer  
374 was added, embryos were spun at 900g for 4 minutes at 4°C, and then resuspended in 800µL  
375 Accumax-egg buffer solution (Innovative Cell Technologies, AM105, 1:3 dilution ratio in egg  
376 buffer). For dissociation, embryos were pipetted up and down ~80 times using a p1000 pipette.  
377 To wash away debris, dissociated embryos were spun at 900g for 4 minutes at 4°C a total of  
378 three times. Washed cells were resuspended in 800µL of cold egg buffer, and single cells were  
379 separated from clumps by gravity settling on ice for 15-20 minutes. For *uaDf5* heteroplasmy  
380 experiments, 25µL of dissociated cells was removed at this stage, mixed 1:1 with worm lysis  
381 buffer, lysed as described below, and stored at -80°C for ddPCR.

382

#### 383 Larval cell dissociation



384 Dissociation of larvae was performed at three stages: starved L1s, mid-L1s (L1s fed 12  
385 hrs, 20°C) and L2s (L1s fed 24hrs, 20°C). Larvae at a specific stage were collected into 15mL  
386 conical tubes, spun down at 3000g for 30 seconds, and washed with ddH<sub>2</sub>O 2-6X. Larvae were  
387 then collected into 1.5mL non-stick tubes and spun at 16,000g for 2 minutes. Depending on  
388 the size of the pellet, larvae were split into multiple tubes such that each tube had no more  
389 than 100µL of pelleted animals. Starved L1s, mid-L1s and L2s were then resuspended in  
390 250µL of SDS-DTT solution (20mM HEPES pH 8.0, 0.25% SDS (Sigma 71725), 200mM DTT  
391 (Sigma D0632), 3% sucrose) and incubated 2, 2.5, and 3 minutes respectively with gentle  
392 mixing. To stop the reaction 1mL of cold egg buffer was added, then animals were spun at  
393 16,000g for 1 minute and washed an additional 5X with cold egg buffer. Following the last  
394 wash, SDS-DTT treated animals were resuspended in 250µL pronase (Sigma P8811) solution  
395 (15mg/mL in egg buffer) and incubated for 5-15 minutes on a rocking nutator at room  
396 temperature. Animals were then dissociated by trituration with a pipet for an additional 25  
397 minutes (~60 times every 5 minutes) in pronase solution. To end the dissociation, 1mL of cold  
398 egg buffer was added and cells were spun down at 9600g for 3 minutes at 4°C. Cell pellets  
399 were resuspended in 1mL of cold egg buffer and washed 3X by spinning 1600g for 6 minutes  
400 at 4°C. Following the final wash, dissociated cells were resuspended in 800µL of cold egg  
401 buffer and separated from undissociated larvae and clumps by gravity settling on ice for 30-40  
402 minutes.

403

#### 404 FACS and PGC isolation

405 For sorting experiments, we used a strain expressing endogenously tagged GLH-1-GFP,  
406 which is a germline-specific protein [55], as well as a transgenic mCherry marker specific to  
407 somatic gonad precursor cells (SGPs) [56], which ensheath the PGCs and are the most likely  
408 contaminating population of cells. Approximately 15 minutes prior to cell sorting, DAPI (Sigma

409 D9542) was added to the cells (final concentration of 0.125ug/mL) as a viability marker. GLH-  
410 1-GFP(+); SGP-mCherry(-); DAPI (-) cells were isolated via FACS using a 100µm nozzle on a  
411 BD FACSAriaII cell sorter. For quality control, sorted cells were live imaged (see ‘microscopy’  
412 below) to confirm the presence of GFP(+); RFP(-) cells. Purity was assayed, via post-sort  
413 analysis (N=3), by resorting cells and quantifying the percentage of GFP(+); RFP(-); DAPI(-)  
414 cells in the population in FlowJo software V10. For most ddPCR analysis, 1000-5000 PGCs  
415 were sorted into 500µL of 0.5X worm lysis buffer (recipe below) in a screw-cap 1.5mL  
416 microfuge tube (20,000 and 10,000 cells were sorted for wild-type and *TFAM-GFP* PGCs  
417 respectively). Following sorting, PGCs were lysed for 30 minutes on ice and then incubated in  
418 a table-top heating block for 1 hour at 55°C followed by 15 minutes at 95°C. Cell lysates were  
419 frozen at -80°C until needed for ddPCR. For live imaging, 1000-2500 PGCs were sorted into  
420 500µL of conditioned L-15 medium (10% FBS, 50 U/mL penicillin + 50 µg/mL streptomycin  
421 (Sigma P4458), adjusted to mOsm 340±5 with 60% sucrose) and kept on ice. Embryonic and  
422 larval PGCs were spun down at 900g (4 minutes) and 1600g (6 minutes) respectively, all but  
423 50µL of conditioned L-15 was removed, and cells were gently resuspended for imaging (see  
424 ‘microscopy’ below).

425

#### 426 *Quantitative PCR (qPCR)*

##### 427 Whole L4 larvae mtDNA copy number

428 For standard curve generation, an 887bp portion of mtDNA containing *nd-1* was  
429 amplified by PCR and TA-cloned into pMiniT2.0 using the NEB PCR cloning kit (NEB E1202S).  
430 Purified plasmid was linearized with *Bam*HI-HF (NEB 3136), and DNA concentration was  
431 quantified using a Nanodrop spectrometer (Thermo scientific). For the standard curve, 64,000,  
432 32,000, 24,000, 16,000, 12,000, 8000, 6000, and 4000 copies of plasmid were run in triplicate  
433 as described below. Oligos targeting the mitochondrial gene *nd-1*(see ‘Droplet digital PCR’

434 below) were used for qPCR quantification. For absolute quantification, single late-L4 larvae  
435 were picked into 5 $\mu$ L of worm lysis buffer (50 mM KCl, 10 mM Tris-HCl (pH 8.0), 2.5 mM  
436 MgCl<sub>2</sub>, 0.45% IGEPAL (Sigma I8896), 0.45% Tween 20 (Sigma P9416), 0.01% gelatin (Sigma  
437 G1393), and 200  $\mu$ g/mL proteinase K (Invitrogen 2530049) and flash frozen at -80°C for 15  
438 minutes. Worms were then lysed in a thermal cycler at 60°C for 1 hour followed by 15 minutes  
439 at 95°C. Prior to qPCR, lysed L4s were diluted 20X by adding 95 $\mu$ L of nuclease-free water  
440 (Invitrogen 4387936) and mixed thoroughly by pipetting. 8 $\mu$ L of lysate (or diluted plasmid for  
441 standard curve) was used in triplicate for each individual sample. qPCR was performed as a  
442 20 $\mu$ L reaction with 500 $\mu$ M of each primer, using BioRad 2X SsoAdvanced Universal SYBR  
443 Green Supermix (BioRad 1725271) in a Roche LightCycler 480 machine. The PCR program  
444 was as follows: 10 minutes at 98°C, 40 cycles of 98°C for 15s and 60°C for 1 minute. Crossing  
445 point (Cp) values were derived using the Second Derivative Maximum method of the Roche  
446 LightCycler 480 software.

447

#### 448 *Whole embryo lysis*

449 Embryos were isolated from gravid adults and chitinase treated for 8 minutes at room  
450 temperature to dissolve the egg shell prior to lysis. Chitinase-treated embryos were washed 2-  
451 3X with cold egg buffer and transferred to a watch glass. Exactly four early-stage embryos  
452 were mouth-pipetted into 20 $\mu$ L worm lysis buffer per tube using a hand pulled glass capillary.  
453 Embryos were then lysed in a thermal cycler (as above) and stored at -80°C.

454

#### 455 *Droplet digital PCR*

456 Prior to ddPCR, various sample types were diluted to different degrees in nuclease-free  
457 water: sorted-PGC lysates (4X), dissociated-embryo lysates (3000-6000X), whole-embryo  
458 lysates (10X), and whole-adult lysates (30 adults lysed in 60 $\mu$ L lysis buffer, 1000X). ddPCR

459 was run according to the manufacturer's recommendations. Briefly, ddPCR reactions were  
460 assembled as 24µL mixes containing 0.1µM of each primer, Bio-Rad QX200 ddPCR  
461 EvaGreen Supermix (BioRad 186-4034), 0.1U/µL *SacI*-HF (New England Biolabs), and 4.8µL  
462 of sample. Reactions were incubated in the dark at room temperature for 30-60 minutes to  
463 allow *SacI*-HF (NEB R3156) digestion to linearize/digest DNA prior to droplet generation. After  
464 incubation, samples were loaded for droplet generation in a BioRad QX200 Automated Droplet  
465 Generator. PCR amplification was performed as follows: 10 minutes at 95°C, 40 cycles of 94°C  
466 for 30s and 60°C for 1 minute, followed by 10 minutes at 98°C for all primer pairs. Samples  
467 were all run in triplicate, and were immediately analyzed using a BioRad QX200 Droplet  
468 reader. All ddPCR reactions were single oligo-pair mixes; therefore, absolute DNA  
469 concentrations were calculated using 1D-amplitude plots in BioRad QuantaSoft software.

470

#### 471 mtDNA copy number quantification by ddPCR

472 Absolute mtDNA copy number per cell was determined using primer pairs targeting  
473 mtDNA (*nd-1*) and gDNA (*cox-4*).

474 mtDNA –

475 *nd-1\_Fw*: 5'- *agcgtcatttattgggaagaagac* -3'

476 *nd1\_Rv*: 5'- *aagcttgctaatcccataaatgt* -3'

477 gDNA –

478 *cox-4\_Fw*: 5'- *gccgactggaagaacttgtc* -3'

479 *cox-4\_Rv*: 5'- *gcgagatcaccttccagta* -3'

480

481 Two independent ddPCR reactions of the same sample were run simultaneously to determine  
482 the mtDNA copies/µL and gDNA copies/µL. mtDNA copy number/cell was calculated as  
483 follows:

484

485 total mtDNAs detected / [total gDNA detected / (N)],

486

487 where the ploidy (N)=4 since *C. elegans* PGCs are arrested in the G2 phase of the cell cycle

488 [19]. For L1 feeding experiments the ploidy was calculated based on the expected verses the

489 actual number of gDNAs detected (Fig. S5). Since the ploidy of starved L1 PGCs is constant,

490 we could normalize our data as such. For example, we found that when we sorted 5000

491 starved L1 PGCs we detected 61 gDNA copies via our ddPCR assay. Therefore, when we

492 sorted 5000 mid-L1 or L2 PGCs and only detected 46 gDNAs we estimated the ploidy as

493 follows:

494

495  $[(\text{actual copies detected: } 46) / (\text{expected copies detected: } 61)] \times 4,$

496

497 where the multiplication factor 4 adjusts the ratio with respect to N=4 for starved L1 PGCs.

498 Thus, for fed L1/L2 PGCs the ploidy (N) can be estimated as approximately 3. This value

499 agrees well with estimated ploidy values based on the calculated cell cycle occupancy times of

500 mitotic germ cells in *C. elegans* adults [57].

501

#### 502 $\Delta$ mtDNA heteroplasmy quantification

503 mtDNA heteroplasmy was determined using four oligo pairs that specifically detect

504 *uaDf5*, *mptDf2*, and their respective complementing WT mtDNAs:

505 For *uaDf5* heteroplasmy –

506 *uaDf5-mtDNA\_Fw*: 5'- ccatccgtgctagaagacaaag -3'

507 *uaDf5-mtDNA\_Rv*: 5'- ctacagtgcattgacctagtcac -3'

508 *WT-mtDNA\_Fw*: 5'- gtccttggtggaatggtgaattac -3'

509 *WT-mtDNA\_Rv*: 5'- gtacttaatcacgctacagcagc -3'

510

511

512 For *mptDf2* heteroplasmy –

513 *mptDf2-mtDNA\_Fw*: 5'- *ggattggcagtttgattagagag* -3'

514 *mptDf2-mtDNA\_Rv*: 5'- *aagtaacaaacactaaaactcccaac* -3'

515 *WT-mtDNA\_Fw*: 5'- *cgtgcttattttcggctgc* -3'

516 *WT-mtDNA\_Rv*: 5'- *ctttaaaccctgtggcactg* -3'

517

518 Two independent ddPCR reactions were run simultaneously for each sample to determine the  
519 WT mtDNA copies/ $\mu$ L and mutant mtDNA copies/ $\mu$ L. Percent heteroplasmy was then  
520 calculated as follows:

521

522  $[\Delta\text{mtDNA} / (\Delta\text{mtDNA} + \text{WT mtDNA})] \times 100$ .

523

524 *Microscopy*

525 Embryos and larvae were mounted on 5% and 10% agarose pads, respectively. Larvae  
526 were immobilized prior to and during image acquisition using 1.25mM levamisole in M9 buffer.  
527 Animals were imaged on a Leica SP8 laser-scanning confocal microscope, using a 63X 1.4 NA  
528 oil-immersion objective with 488 and 594 nm lasers and HyD detectors; or on a Zeiss  
529 Axiolmager A2, using a 40X 1.3 NA oil-immersion objective and a CCD camera (model  
530 C10600-10B-H, S. 160522; Hamamatsu). For sorted PGC imaging, 5 $\mu$ L of sorted embryonic  
531 and larval PGCs in conditioned L-15 (see 'FACS and PGC isolation' above) were mounted on  
532 custom depression slides to avoid crushing the cells. Sorted PGCs were then imaged on a  
533 Zeiss Axiolmager A2 as above. Images were analyzed and processed in ImageJ (NIH), and  
534 Adobe Photoshop.

535

536 *Image analysis*

537 Mitochondrial acidification

538           Acidification of mitochondria was measured in embryos and L1 larvae by determining  
539 the ratio of green-to-red fluorescence of mito-mCherry<sup>PGC</sup> (pKa 4.5) and mito-Dendra2<sup>PGC</sup> (pKa  
540 6.5). For L1 larvae, 488nm and 594nm laser intensities were adjusted to ensure a similar  
541 dynamic range of signal intensity for mito-mCherry<sup>PGC</sup> and mito-Dendra2<sup>PGC</sup> within the PGC  
542 cell body. Two regions of interests (ROIs) were drawn - one around PGC lobe debris and the  
543 other around cell body mitochondria. Red and green signal intensity was then measured and  
544 analyzed using ImageJ (NIH) software.

545           Acidified mitochondria in the embryo were defined as regions of the PGC mitochondrial  
546 network where red signal overtook green, such that the measured green-to-red signal ratio  
547 was at least two-fold less compared to the greater mitochondrial network (Fig. S7). PGCs of  
548 1.5-fold to 2-fold embryos were imaged and scored categorically as either containing, or not  
549 containing, regions of acidified mitochondria. An ROI was then drawn around regions with red  
550 dominant signal, and green/red signal intensity was measured in ImageJ. Green/red signal  
551 was also measured within an ROI enclosing the rest of the mitochondrial network for  
552 comparison.

553

554 Quantification of mitochondrial localization in PGCs

555           1.5-fold and 2-fold embryos were imaged as described above. Mitochondrial content  
556 was measured as a sum of Mito-Dendra<sup>PGC</sup> positive voxels within the PGC using ImageJ. A  
557 region of interest was then drawn specifically around the PGC cell body using Mem-mCh<sup>PGC</sup> as  
558 a marker, and the fraction of mitochondria in the PGC cell body was calculated as a ratio of  
559 total PGC mitochondria.

560



561 *In vivo* measurement of PGC and whole embryo volume

562 The volume of PGCs was determined in embryos just prior to lobe formation (bean  
563 stage) and in starved L1 larvae. A Z-stack was taken through the PGCs of animals expressing  
564 a PGC specific membrane marker (PGC-GFP::*PH<sub>PLC1 $\beta$ 1</sub>*) [58], the volume of both PGCs was  
565 measured by defining the PGC surfaces using the image analysis platform Imaris(Oxford  
566 Instruments); the volume contained within them was measured and divided by two to  
567 determine the volume per single PGC. Three independent biological replicates (N) with sample  
568 size  $n \geq 18$  were used to calculate PGC volume for embryos and L1s. The mean of means was  
569 used to calculate the average PGC volume and standard error of the mean (SEM). Embryo  
570 volume was calculated by measuring the anterior-posterior and left-right axes of fertilized  
571 embryos in ImageJ. Whole embryos were assumed to approximate an ellipsoid, and the  
572 volume was calculated using the formula  $V = 4/3 \pi a*b*c$ , where a, b, and c are the radii of the  
573 three axes of the ellipsoid (the width and height of embryos were assumed to be equal). Three  
574 independent biological replicates (N) with sample size  $n \geq 13$  were used to calculate whole  
575 embryo volume. The mean of means was used to calculate the average PGC volume and  
576 standard error of the mean (SEM).

577

578 Quantification of TFAM foci

579 Embryos, starved L1, early-L1, mid-L1, late-L1, and L2 larvae were mounted as  
580 described above (see 'Microscopy'). A full Z-stack of the entire germline was taken for each  
581 animal. Germline TFAM-GFP/GFP(11) foci were identified using ImageJ to segment TFAM-  
582 GFP/GFP11 signal that colocalized with mito-mCherry<sup>PGC</sup>. Colocalized TFAM-GFP/GFP(11)  
583 foci were then defined as local signal maxima and counted using the 3D maxima plugin of the  
584 ImageJ 3D suite.

585

586 PGC counts

587 Embryos and starved L1 larvae were assumed to have exactly two PGCs. For fed  
588 larvae expressing TFAM-GFP/GFP(11) and Mito-mCh<sup>PGC</sup>, the number of cells per animal was  
589 determined by counting the dark spots in image stacks surrounded by Mito-mCh<sup>PGC</sup> as a proxy  
590 for germ cell nuclei. For cell sorting experiments, fed larvae were mounted and imaged just  
591 prior to cell dissociation (see 'larval cell dissociation' above), germ cell counts were determined  
592 by counting the number of nuclei surrounded by GLH-1-GFP.

593

#### 594 Ex vivo measurement of sorted PGC volume

595 Sorted embryonic and L1 PGCs were imaged as described above (see 'Microscopy').  
596 PGC diameter was calculated by drawing a line across the center of the cell and measuring its  
597 length in ImageJ. PGC volume was determined under the assumption that the PGCs  
598 approximate a sphere, and volume was calculated with the formula  $V = 4/3\pi r^3$ .

599

#### 600 *Transgene construction*

601 Transgenes *Pmex-5::tomm-20(a.a.1-54)::Dendra2::nos-2<sup>3'UTR</sup>* (plasmid pYA57) and  
602 *Pmex-5::gfp1-10::nos-2<sup>3'UTR</sup>* (plasmid pAS07) were constructed by Gibson assembly [59].  
603 Briefly, overlapping primers were used to amplify *tomm-20(a.a.1-54)::Dendra2* to replace  
604 *mCherry::moma-1* in *pYA11(Pmex-5::mCherry::moma-1::nos-2<sup>3'UTR</sup>)*, a derivative of *pCFJ150*.  
605 Split *gfp1-10* (based on mammalian versions of the protein) was *C. elegans* codon optimized,  
606 designed with introns and ordered as a gBlock (IDT) with overhangs to replace *mCherry-PH* in  
607 *pAS06(Pmex-5::mCherry-PH::nos-2<sup>3'UTR</sup>)*, a derivative of *pCFJ150* that lacks a portion the  
608 universal MosSCI homology sequence to facilitate CRISPR mediated insertion of the plasmid  
609 [60].

610

#### 611 *Transgenesis and genome editing*

#### 612 MosSCI

613 *Pmex-5::tomm-20(a.a.1-54)::Dendra2::nos-2<sup>3'UTR</sup>* was microinjected into strain EG8708  
614 to create a single-copy chromosomal insertion on chromosome I via the universal MosSCI  
615 method [61].

616

## 617 CRISPR/Cas9

618 In all cases, CRISPR/Cas9 mediated genome editing was performed using pre-  
619 incubated Cas9 (Berkeley)::sgRNA (IDT) ribonuclear protein, and injection quality was  
620 screened using the co-CRISPR *dpy-10(cn64)* mutation as previously described [62]. DNA  
621 repair templates contained ~25-35bps of homology, and varied depending on the size of  
622 insertion as either dsDNA PCR product or plasmid (>150bps), or ssDNA oligos (<150bps)  
623 (IDT). crRNAs and insertion sequences are listed in Supplemental Table 2 and Supplemental  
624 Sequences. For the generation of putative null alleles, we used the 'STOP-IN' method [63] to  
625 insert an early stop and frame-shift into either the first, or second, exon of the target gene. All  
626 strains generated by CRISPR are included in Supplemental Table 1.

627

## 628 *Statistical analysis and reproducibility*

629 Statistical analysis was performed in GraphPad Prism 9 software. For categorical data,  
630 such as scoring acidified mitochondria in PGCs, contingency tables were made and Fisher's  
631 exact test was used to calculate *p*-values. For all other data, two-tailed Student's *t*-tests (paired  
632 and unpaired) were performed. Data in graphs are shown as Superplots [64], with individual  
633 data points from three independent color-coded biological replicates (except for ddPCR  
634 experiments where small dots are technical replicates of the ddPCR analysis) shown as small  
635 dots, the mean from each experiment shown as a larger circle, the mean of means as a  
636 horizontal line, and the S.E.M as error bars. Sample size, *t*-test type and *p*-value ranges are  
637 reported in Figure Legends. Where applicable, no corrections for multiple comparisons were  
638 made to avoid type II errors [65]. For live imaging, embryos and larvae were selected based

639 on orientation on the slide and on health. For all datasets, at least three biologically  
640 independent experiments were performed and the arithmetic means of biological replicates  
641 were used for statistical analysis.

642

643

644

645

646

647

648

649

650

651

652

653

654

655

656

657

658

659

660

661

662

663

664

Figure 1

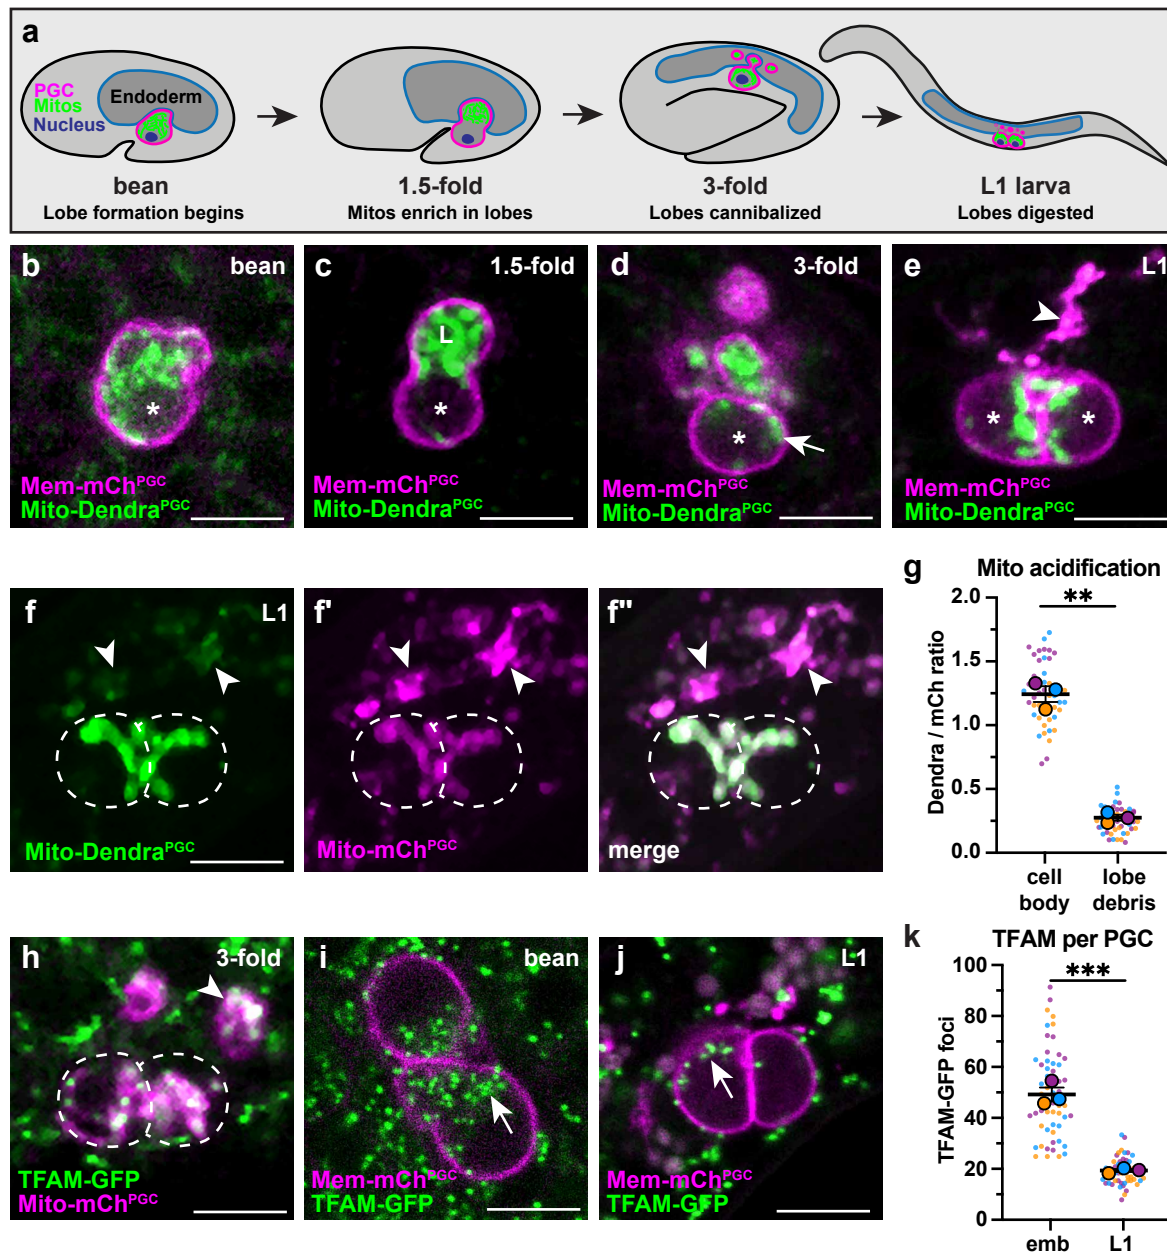

665 **Figure 1. PGC lobe mitochondria and mtDNAs are cannibalized and digested**

666 (a). Schematic of PGC lobe formation and cannibalism. Bean stage to 3-fold embryos, one  
667 PGC visible; L1 larva, both PGCs visible. PGCs (magenta), PGC mitochondria (green) and  
668 endoderm (blue) are shown. (b-e) Plasma membranes and mitochondria in an embryonic  
669 PGCs just as lobes form (b), in PGCs with lobes (c-d) and in two L1 larval PGCs after lobes  
670 are digested (e; arrowhead, lobe debris in endoderm). \*, nucleus, 'L', lobe. (f-f'') Acidified  
671 mitochondria (arrowheads) in digested PGC lobes of L1 larvae. Dashed lines, outline of PGC  
672 cell bodies. (g) Quantification of Mito-Dendra<sup>PGC</sup> over Mito-mCh<sup>PGC</sup> ratio in L1 PGCs revealing  
673 acidification in lobe debris relative to the cell body. (h) TFAM-GFP puncta within PGC  
674 mitochondria, present in both the cell body and in recently cannibalized lobes (arrowhead).  
675 Dashed lines, outline of PGC cell bodies. (i-j) TFAM-GFP in embryonic (i) and L1 larval (j)  
676 PGCs. (k) Quantification of TFAM-GFP foci in embryonic and L1 PGCs. Data in graphs are  
677 shown as a Superplot, with individual data points from three independent color-coded  
678 biological replicates shown as small dots, the mean from each experiment shown as a larger  
679 circle, the mean of means as a horizontal line, and the S.E.M as error bars. \*\* $p \leq 0.01$ ,  
680 \*\*\* $p \leq 0.001$ , unpaired two-tailed Student's *t*-test (k) and paired-ratio Student's *t*-test (g). Scale  
681 bars, 5 $\mu$ m.

682

683

684

685

686

687

688

689

690

## Figure 2

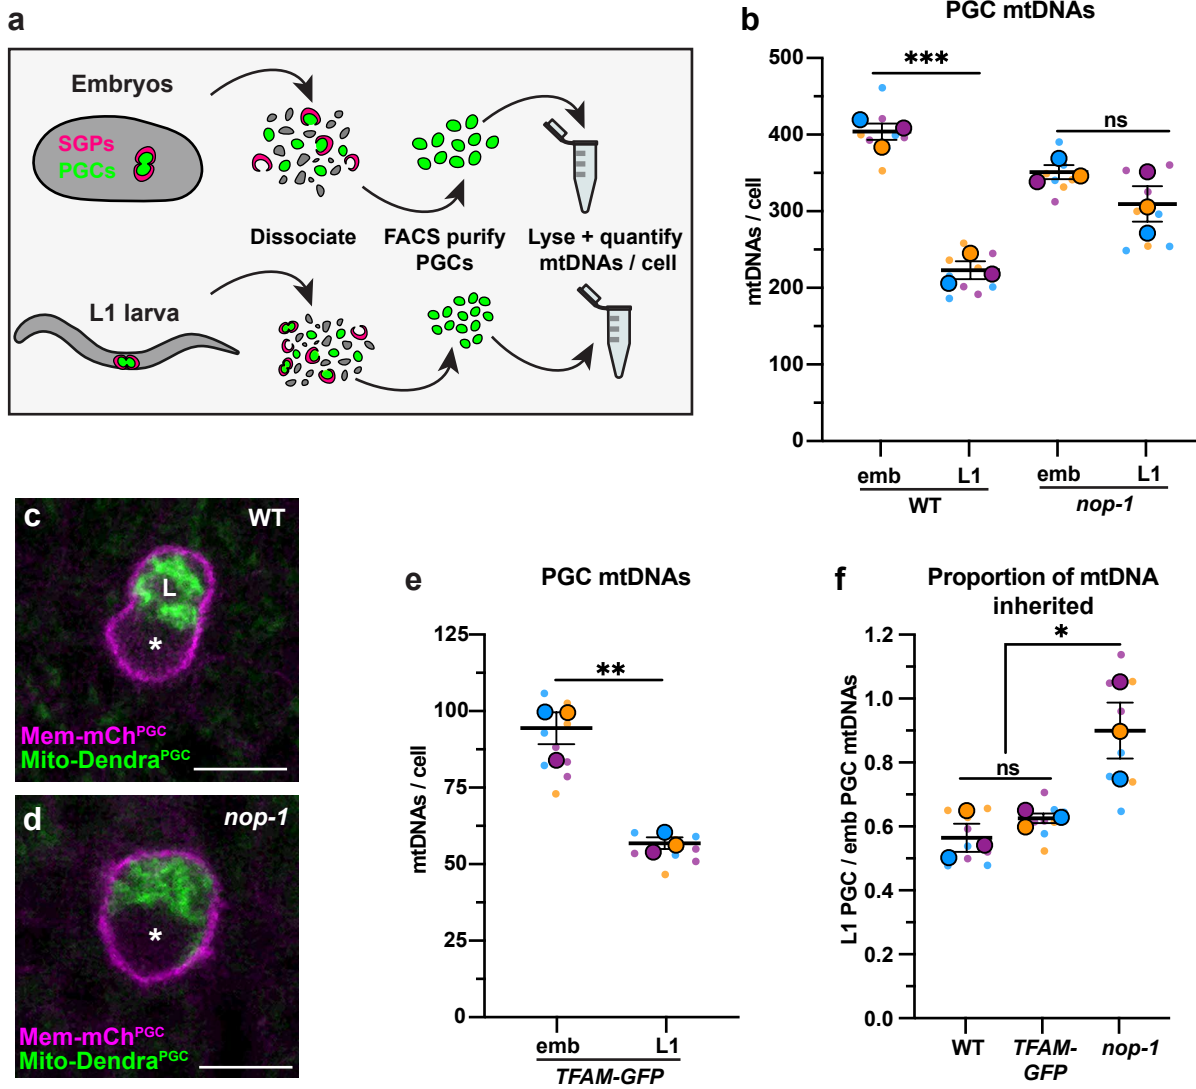



691 **Figure 2. PGC lobe cannibalism eliminates a fixed fraction of mtDNAs**

692 (a) Schematic of FACS strategy to isolate PGCs from dissociated embryos and L1 larvae and  
693 quantify mtDNAs (see also Figure S3). (b) Quantification of mtDNA copy number per PGC in  
694 embryos and L1 of WT and *nop-1* mutants. (c-d) Mitochondria and plasma membrane in wild-  
695 type and *nop-1* mutant PGCs. (e) Quantification of mtDNA copy number per PGC in *TFAM-*  
696 *GFP* embryos and L1 larvae. (f) Proportion of embryonic PGC mtDNAs inherited by L1 PGCs  
697 in wild type, *TFAM-GFP*, and *nop-1* mutants (from data in b,e). Data in graphs: small dots are  
698 three technical replicates of ddPCR quantification from each of three color-coded biological  
699 replicates; the technical replicate mean from each experiment is shown as a larger circle, the  
700 mean of means as a horizontal line, and the S.E.M as error bars. n.s., not significant ( $p > 0.05$ ),  
701  $*p \leq 0.05$ ,  $**p \leq 0.01$ ,  $***p \leq 0.001$ , unpaired two-tailed Student's *t*-test. Scale bars, 5 $\mu$ m.

702

703

704

705

706

707

708

709

710

711

712

713

714

715

716

Figure 3

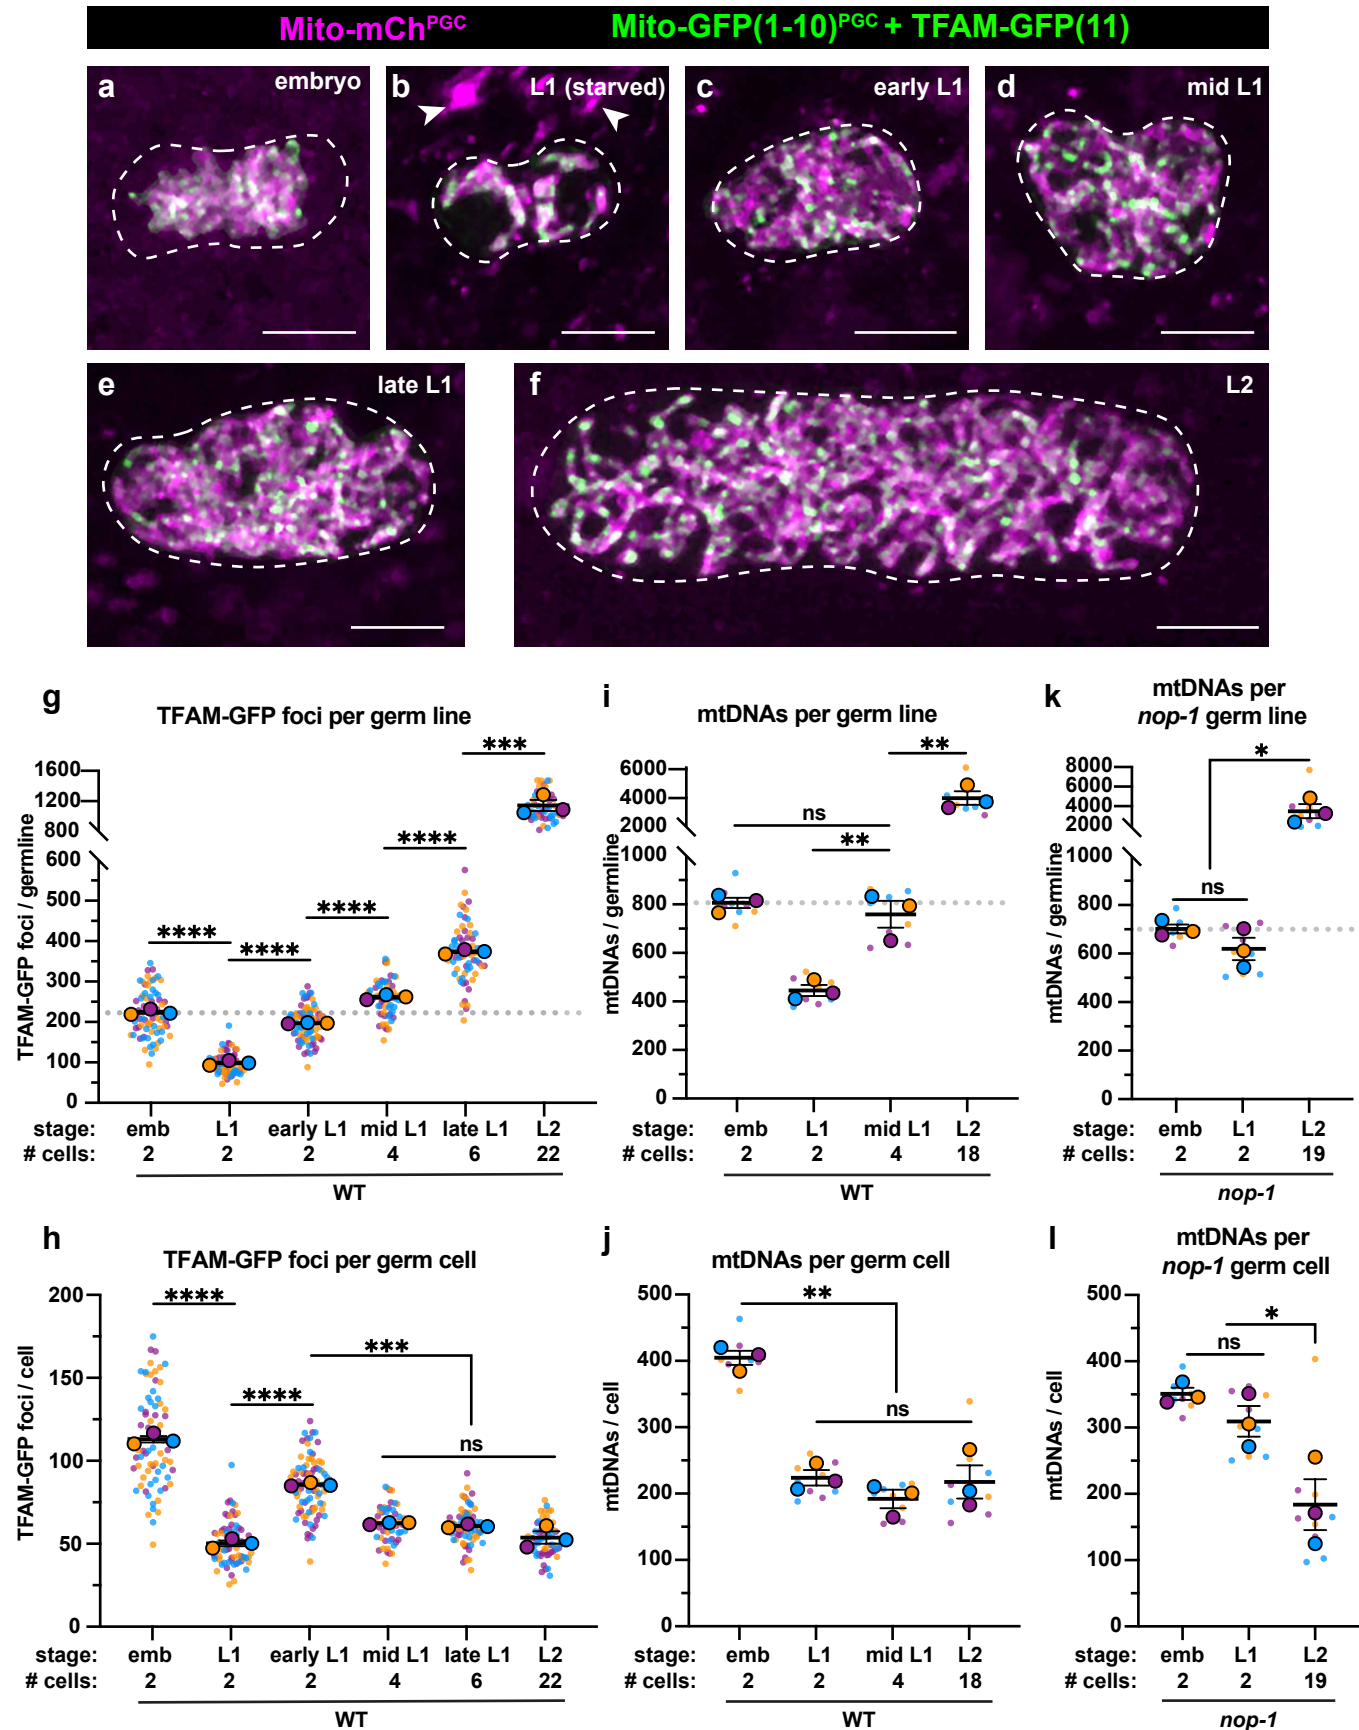

717 **Figure 3. PGC lobe cannibalism generates an mtDNA bottleneck and set point**

718 **(a-f)** Germline mitochondria and TFAM-GFP(11) in live embryos and larvae at the indicated  
719 stage. Dashed lines outline the PGCs or GSCs. **(g-h)** Quantification of TFAM-GFP(11) foci per  
720 germ line (g) and per germ cell (h) in embryos and larvae. **(i-j)** Quantification of mtDNAs per  
721 germ line (i) or per germ cell (j) in embryos and larvae; data shown for PGC mtDNA copy  
722 number in embryos and starved L1s are provided for comparison and originate from Fig. 2  
723 panel (b). **(k-l)** Quantification of mtDNAs per germ line (k) or per germ cell (l) in *nop-1* mutant  
724 embryos and larvae; data shown for PGC mtDNA copy number in *nop-1* mutant embryos and  
725 starved L1s are provided for comparison and originate from Fig. 2 panel (b). Data in graphs:  
726 small dots are individual animals [TFAM-GFP(11) measurements] or technical replicates  
727 (ddPCR experiments) from three color-coded biological replicates; the mean from each  
728 experiment is shown as a larger circle, the mean of means as a horizontal line, and the S.E.M  
729 as error bars. n.s., not significant ( $p > 0.05$ ),  $*p \leq 0.05$ ,  $**p \leq 0.01$ ,  $***p \leq 0.001$ ,  $****p \leq 0.0001$   
730 unpaired two-tailed Student's *t*-test. Scale bars, 5 $\mu$ m.

731

732

733

734

735

736

737

738

739

740

741

742

**Figure 4**

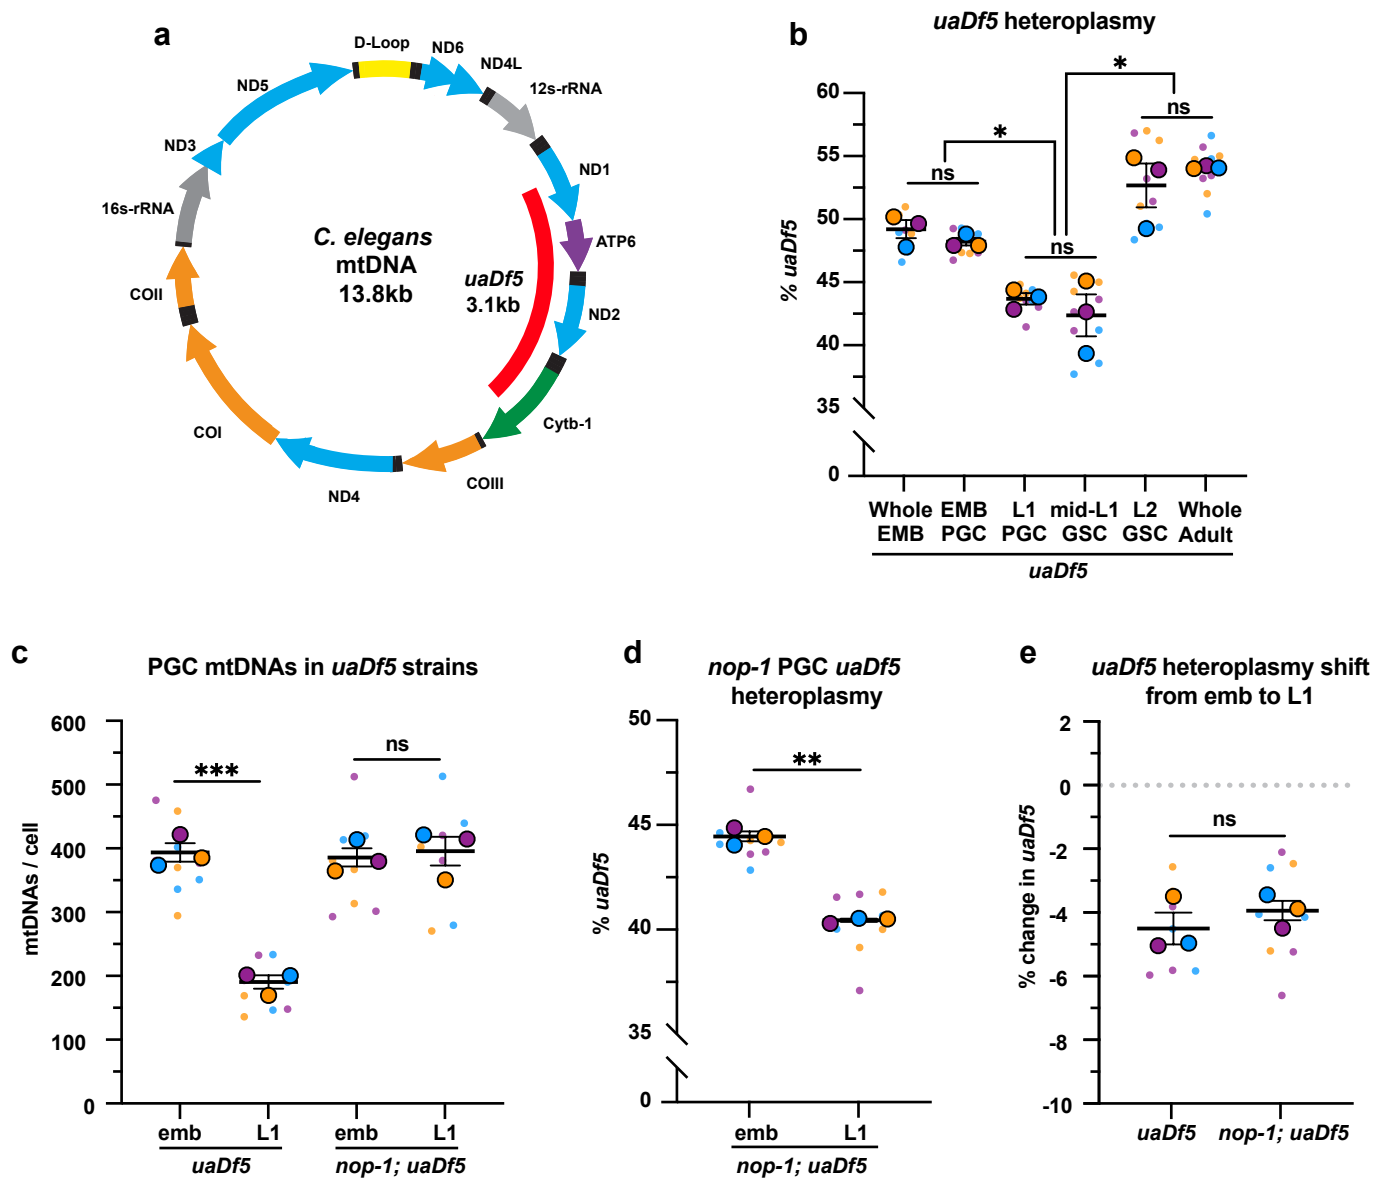

743 **Figure 4. PGCs reduce *uaDf5* heteroplasmy independently of lobe cannibalism**

744 (a) Schematic of *C. elegans* mtDNA; genes are indicated with colored arrows and the region  
745 deleted in *uaDf5* is shown with a red bar. (b) Quantification of *uaDf5* heteroplasmy in whole  
746 embryos, sorted PGCs or GSCs, or whole adults at the indicated stages. (c) Quantification of  
747 mtDNA copy number in PGCs of *uaDf5* and *nop-1*; *uaDf5* mutants. (d) Quantification of *uaDf5*  
748 heteroplasmy in *nop-1*; *uaDf5* mutant PGCs. (e) Data from (b and d) presented as change in  
749 heteroplasmy shift from embryonic to L1 PGCs. Data in graphs: small dots are three technical  
750 replicates of ddPCR quantification from each of three color-coded biological replicates; the  
751 technical replicate mean from each experiment is shown as a larger circle, the mean of means  
752 as a horizontal line, and the S.E.M as error bars. n.s., not significant ( $p > 0.05$ ),  $*p \leq 0.05$ ,  
753  $**p \leq 0.01$ ,  $***p \leq 0.001$ , paired (b, d) and unpaired (b, c, e) two-tailed Student's *t*-test.

754

755

756

757

758

759

760

761

762

763

764

765

766

767

768

**Figure 5**

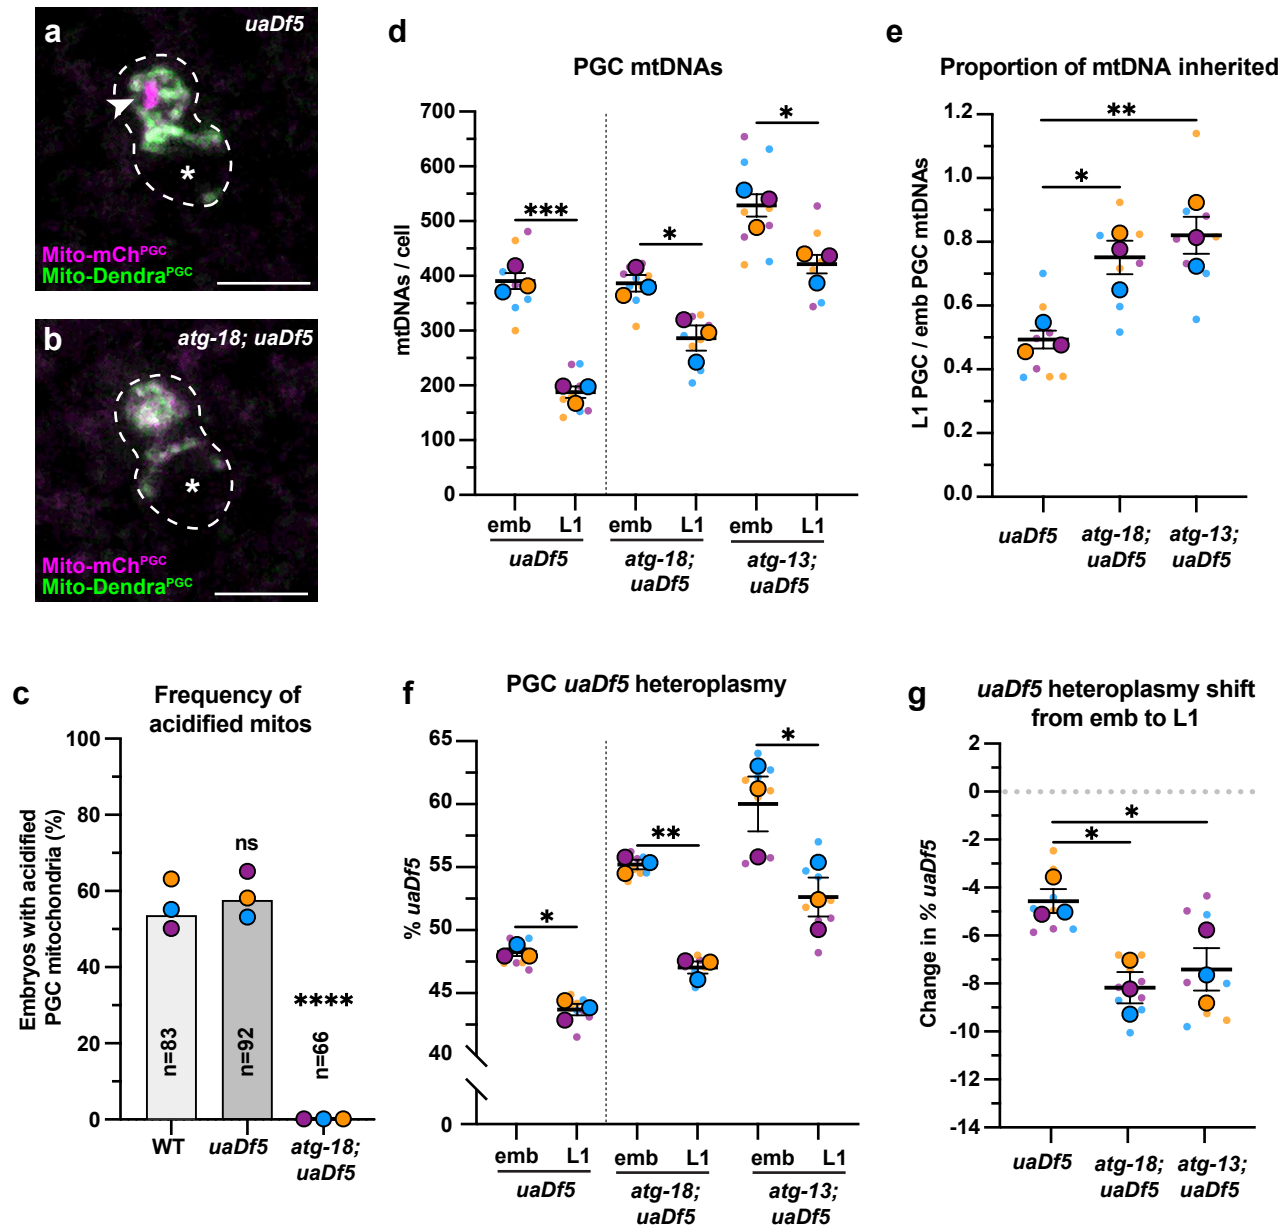

769 **Figure 5. Autophagy eliminates a pool of PGC mtDNAs non-selectively**

770 **(a-b)** Acidified mitochondria (red regions, arrowhead in a) in *uaDf5* PGCs (a) and absent in  
771 *atg-18; uaDf5* PGCs. **(c)** Percent of embryos with acidified mitochondria in PGCs. Three  
772 biological replicates ( $N \geq 16$ ) are shown as colored circles, with peak of the bar on the graph  
773 representing the mean. Fisher's exact test was used to determine statistical significance. n.s.,  
774 not significant ( $p > 0.05$ ), \*\*\*\*  $p \leq 0.0001$  **(d)** mtDNA copy number in *atg-18; uaDf5*, and *atg-13;*  
775 *uaDf5* embryonic and L1 PGCs; data shown for *uaDf5* are provided for comparison, originate  
776 from Figure 4 panel (c), and are delineated with a dashed line. **(e)** Data from (d) presented as  
777 proportion of embryonic PGC mtDNAs inherited by L1 PGCs. **(f)** *uaDf5* heteroplasmy in *atg-18;*  
778 *uaDf5*, and *atg-13; uaDf5* PGCs; data shown for *uaDf5* are provided for comparison, originate  
779 from Figure 4 panel (b), and are delineated with a dashed line. **(g)** Data from (f) presented as  
780 change in heteroplasmy shift from embryonic to L1 PGCs. Data in graphs: small dots are three  
781 technical replicates of ddPCR quantification from each of three color-coded biological  
782 replicates; the technical replicate mean from each experiment is shown as a larger circle, the  
783 mean of means as a horizontal line, and the S.E.M as error bars. n.s., not significant ( $p > 0.05$ ),  
784 \* $p \leq 0.05$ , \*\* $p \leq 0.01$ , \*\*\* $p \leq 0.001$  paired (f) and unpaired (d, e, g) two-tailed Student's *t*-test.

785

786

787

788

789

790

791

792

793

794



# Figure 6

bioRxiv preprint doi: <https://doi.org/10.1101/2022.05.06.490954>; this version posted May 7, 2022. The copyright holder for this preprint (which was not certified by peer review) is the author/funder, who has granted bioRxiv a license to display the preprint in perpetuity. It is made available under a [CC-BY-NC-ND 4.0 International license](https://creativecommons.org/licenses/by-nc-nd/4.0/).

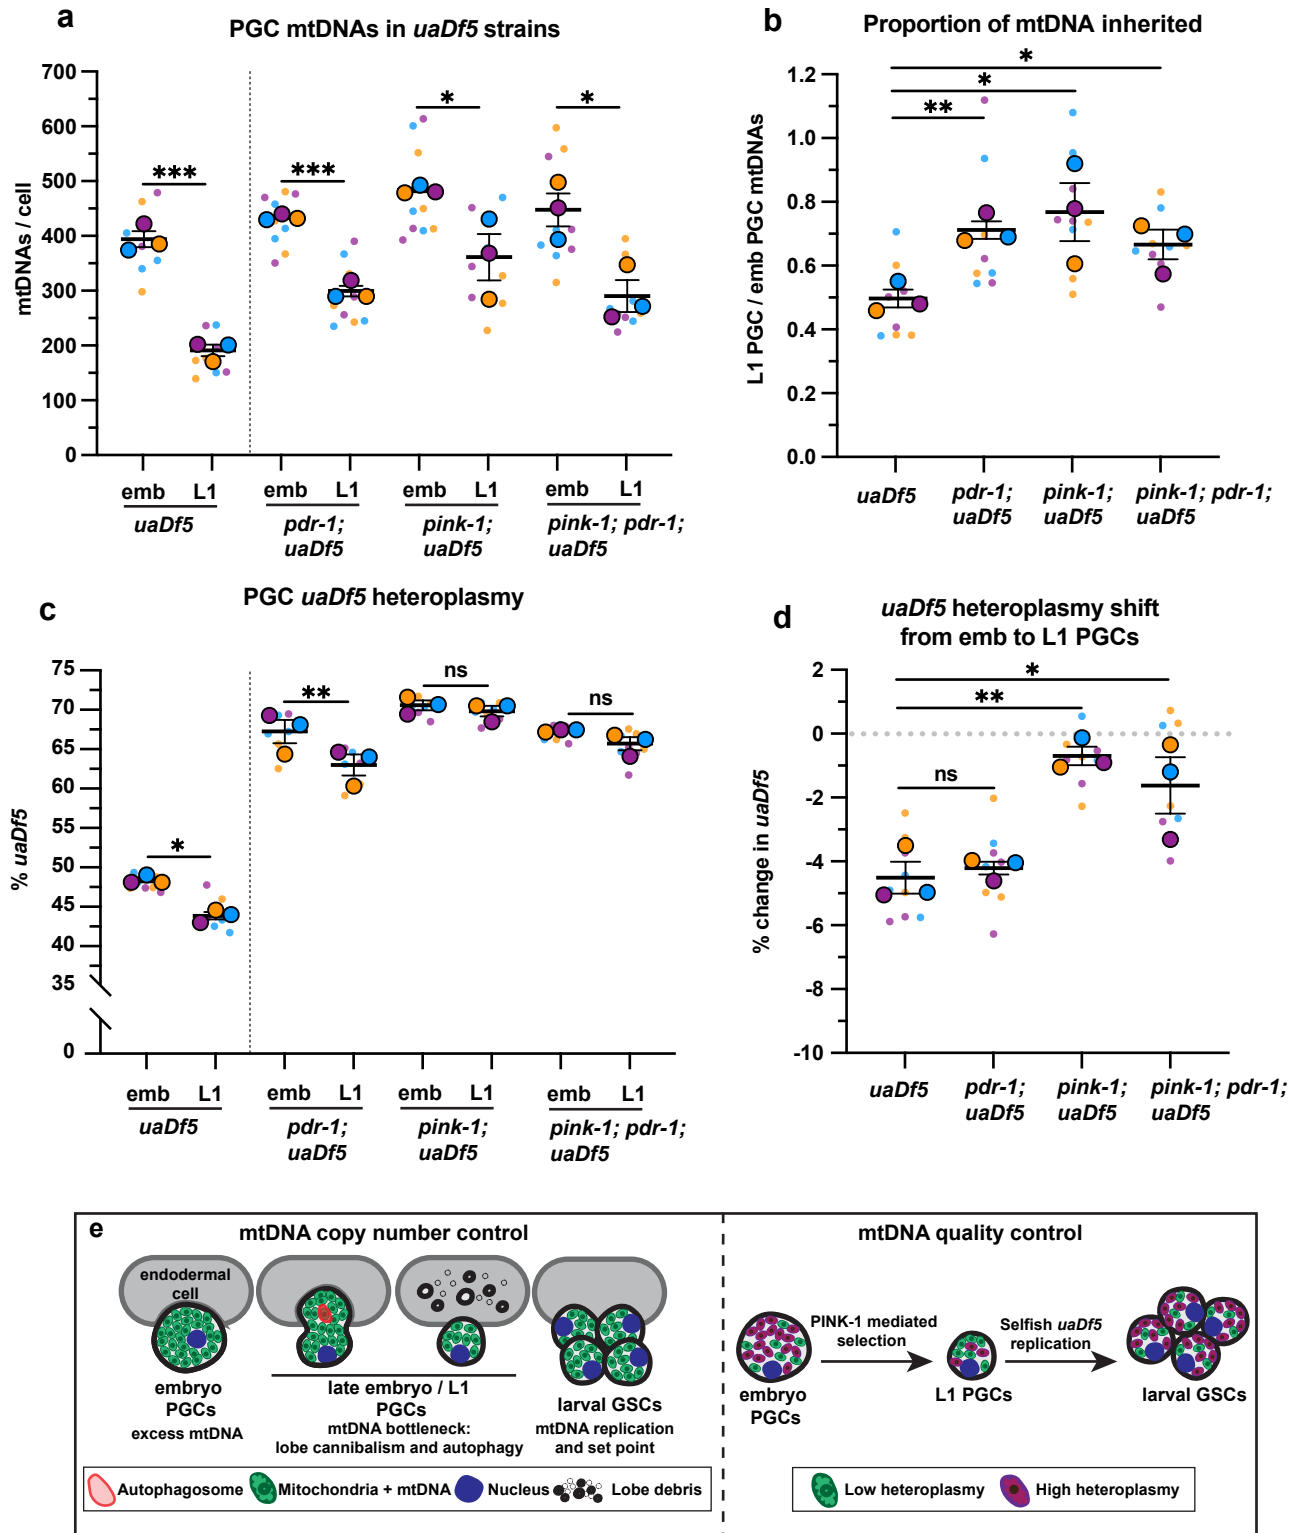

795 **Figure 6. The kinase PINK-1 mediates mtDNA purifying selection in PGCs**

796 (a) mtDNA copy number in *pdr-1; uaDf5*, *pink-1; uaDf5*, and *pink-1; pdr-1; uaDf5* embryonic  
797 and L1 PGCs; data shown for *uaDf5* are provided for comparison, originate from Figure 4  
798 panel (c), and are delineated with a dashed line. (b) Data from (a) presented as proportion of  
799 embryonic PGC mtDNAs inherited by L1 PGCs. (c) Percent *uaDf5* heteroplasmy in *pdr-1*;  
800 *uaDf5*, *pink-1; uaDf5*, and *pink-1; pdr-1; uaDf5*; data shown for *uaDf5* are provided for  
801 comparison, originate from Figure 4 panel (b), and are delineated with a dashed line. Data in  
802 graphs: small dots are three technical replicates of ddPCR quantification from each of three  
803 color-coded biological replicates; the technical replicate mean from each experiment is shown  
804 as a larger circle, the mean of means as a horizontal line, and the S.E.M as error bars. n.s., not  
805 significant ( $p > 0.05$ ),  $*p \leq 0.05$ ,  $**p \leq 0.01$ ,  $***p \leq 0.001$ , paired (c) and unpaired (a, b, d) two-  
806 tailed Student's *t*-test. (e) Model for regulation of mtDNA quantity and quality in PGCs and  
807 GSCs.

808

809

810

811

812

813

814

815

816

817

818

819

820

## Figure S1

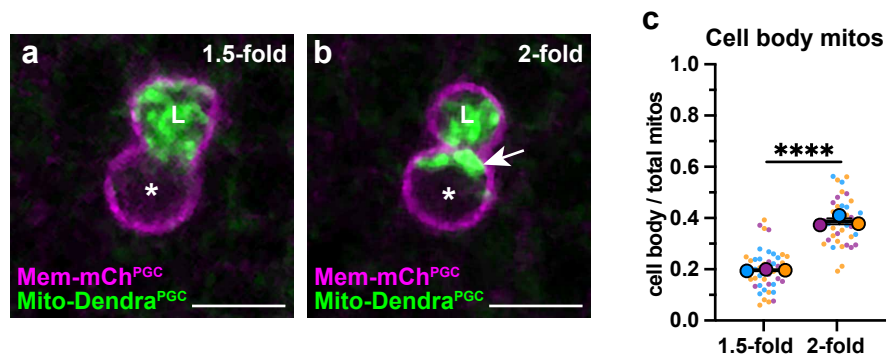

821 **Figure S1. A subset of PGC mitochondria is retained in the cell body prior to lobe**

822 **digestion**

823 **(a-b)** Representative images of plasma membranes and mitochondria in an embryonic PGC as

824 mitochondria localize into lobes (1.5 fold, a) and as lobe cannibalism is initiated (2-fold, b). A

825 subset of mitochondria (arrowhead, b) is retained in the cell body. \*, nucleus, 'L', lobe. **(c)**

826 Quantification of mitochondrial fraction within the cell body in 1.5-fold and 2-fold stage PGCs.

827 Data in graph: Individual data points from three independent color-coded biological replicates

828 shown as small dots, the mean from each experiment shown as a larger circle, the mean of

829 means as a horizontal line, and the S.E.M as error bars. \*\*\*\* $p \leq 0.0001$ , unpaired two-tailed

830 Student's *t*-test Student's *t*-test (g). Scale bars, 5 $\mu$ m.

831

832

833

834

835

836

837

838

839

840

841

842

843

844

845

846

## Figure S2

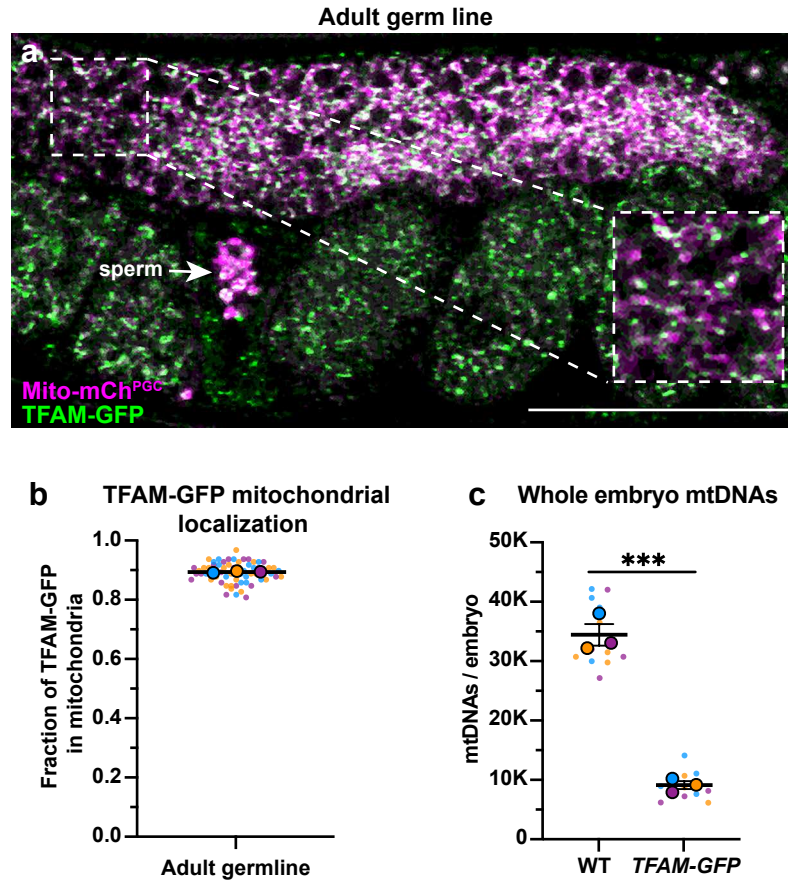

847 **Figure S2. TFAM-GFP mitochondrial localization, and effect on mtDNA copy number**

848 (a) Endogenously tagged TFAM-GFP and mitochondria in the adult germ line; mitochondria  
849 and TFAM-GFP also localize to sperm (arrow). (b) Quantification of the fraction of TFAM-GFP  
850 overlap with Mito-mCh<sup>PGC</sup>. (c) Quantification of mtDNA copy number in wild type and *TFAM-*  
851 *GFP* whole early embryos. Data shown: Small dots are data points from individual worms (b)  
852 or technical replicates of ddPCR quantification (c) from each of 3-4 color-coded biological  
853 replicates; the mean from each biological replicate is shown as a larger circle, the mean of  
854 means as a horizontal line, and the S.E.M as error bars. \*\*\* $p \leq 0.001$ , unpaired two-tailed  
855 Student's *t*-test (c). Scale bar, 50 $\mu$ m.

856

857

858

859

860

861

862

863

864

865

866

867

868

869

870

871

872

### Figure S3

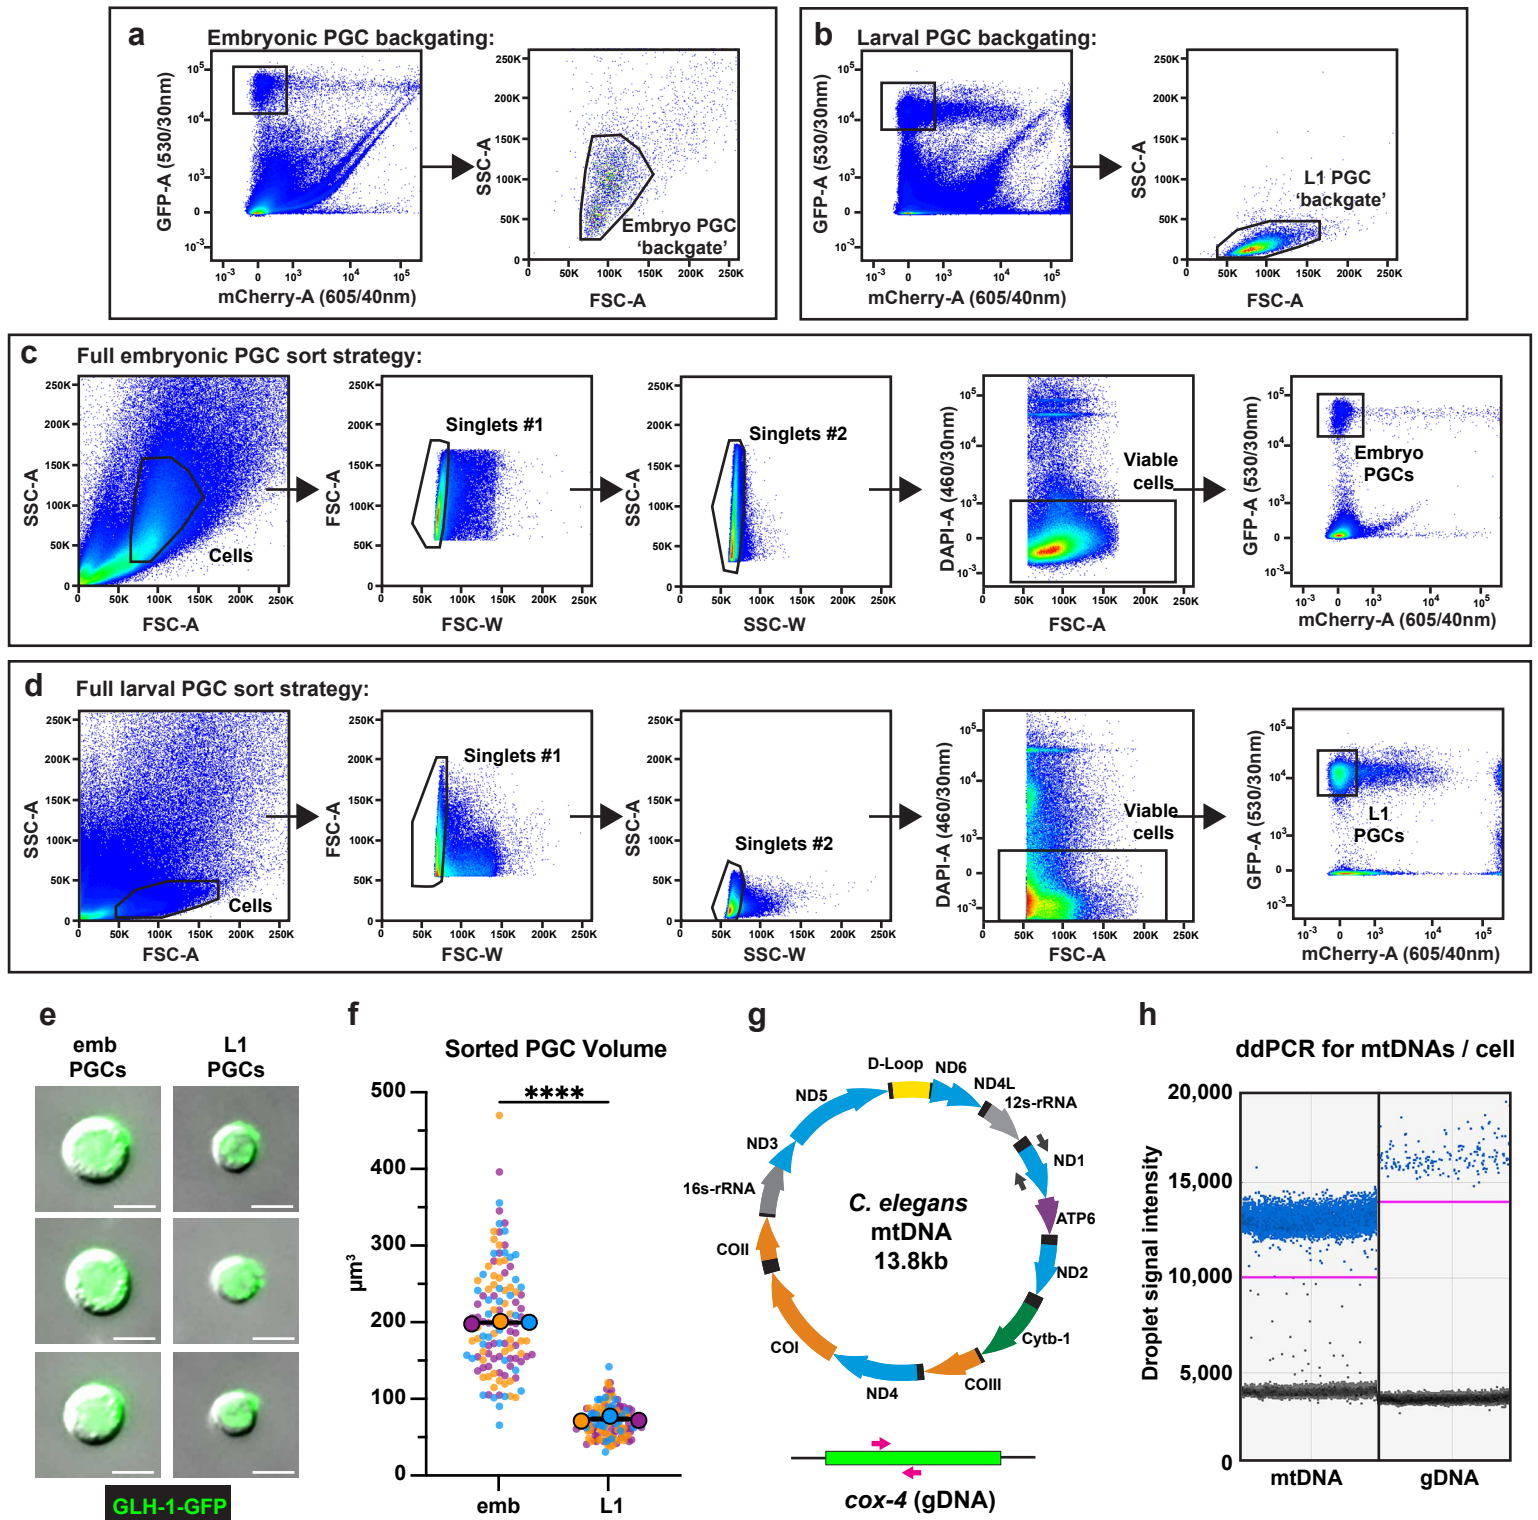



873 **Figure S3. PGC FACS purification gating strategy, quality control, and ddPCR**

874 **(a-d)** Full gating strategies for isolating embryonic and L1 PGCs from dissociations. Size  
875 exclusion gates (FSC-A x SSC-A) containing PGCs were determined by back-gating on all  
876 GFP<sup>+</sup>mCherry<sup>-</sup> events in embryonic (a) and L1 (b) dissociations. **(c-d)** Following size  
877 exclusion, two doublet discrimination gates (FSC-A x FSC-W and SSC-A x SSC-W) were  
878 applied to select for singlet cells, DAPI-negative cells were selected for viability, and pure  
879 GFP<sup>+</sup>mCherry<sup>-</sup> embryonic (c) and L1 (d) PGCs were sorted. **(e)** Representative images of  
880 embryonic and larval PGCs post-FACS. **(f)** Quantification of sorted PGC volume. Small dots  
881 are data points from individual cells from each of three color-coded cell sorting experiments;  
882 the mean from each sorting experiment is shown as a larger circle, the mean of means as a  
883 horizontal line, and the S.E.M as error bars. \*\*\*\* $p \leq 0.0001$ , unpaired two-tailed Student's *t*-test.  
884 **(g)** Schematic of *C. elegans* mtDNA and genomic DNA targets, as well as color-coded primer  
885 pairs for detecting mtDNA and gDNA by ddPCR. Grey primers, mtDNA, magenta primers,  
886 gDNA. **(h)** Representative ddPCR plot for quantifying mtDNA (*nd-1* gene) and gDNA (*cox-4*  
887 gene) copy number in sorted PGC lysates. Positive droplets (blue dots), negative droplets  
888 (black dots) and threshold for positive droplets (magenta line) are shown. Scale bars, 5 $\mu$ m.

889

890

891

892

893

894

895

896

897

898

Figure S4

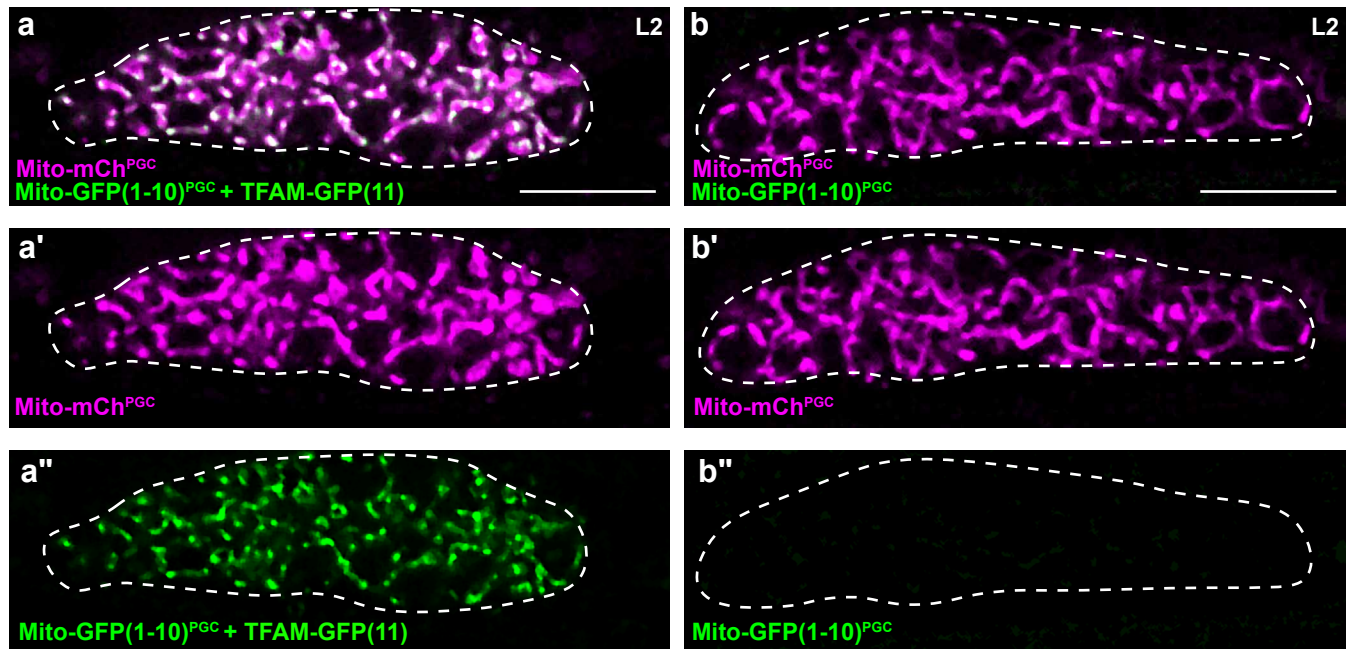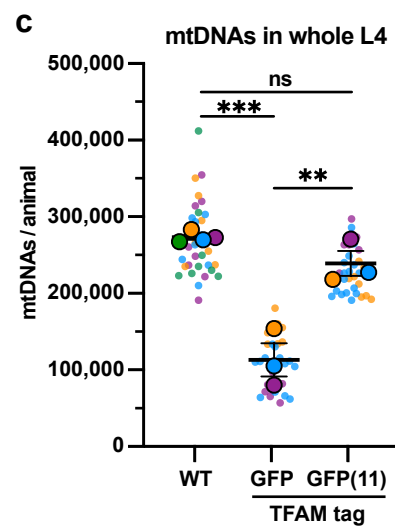

899 **Figure S4. TFAM-GFP(11) visualization and effect on mtDNA copy number**

900 **(a-b'')** Germline mitochondria and GFP(1-10) in L2 larvae, with (a-a'') or without (b-b'')

901 endogenously tagged TFAM-GFP(11). Dashed line, outline of gonad. **(c)** Quantification of

902 mtDNA copy number in whole L4 larvae assayed by qPCR in WT, *TFAM-GFP*, and *TFAM-*

903 *GFP(11)*; *Mito-GFP(1-10)<sup>PGC</sup>* genetic backgrounds. Small dots are data points from individual

904 L4 worms from each of three color-coded biological replicates; the mean from each replicate is

905 shown as a larger circle, the mean of means as a horizontal line, and the S.E.M as error bars.

906 n.s., not significant ( $p > 0.05$ ),  $**p \leq 0.01$ ,  $***p \leq 0.001$ , unpaired two-tailed Student's *t*-test.

907 Scale bars, 10 $\mu$ m.

908

909

910

911

912

913

914

915

916

917

918

919

920

921

922

923

924

**Figure S5**

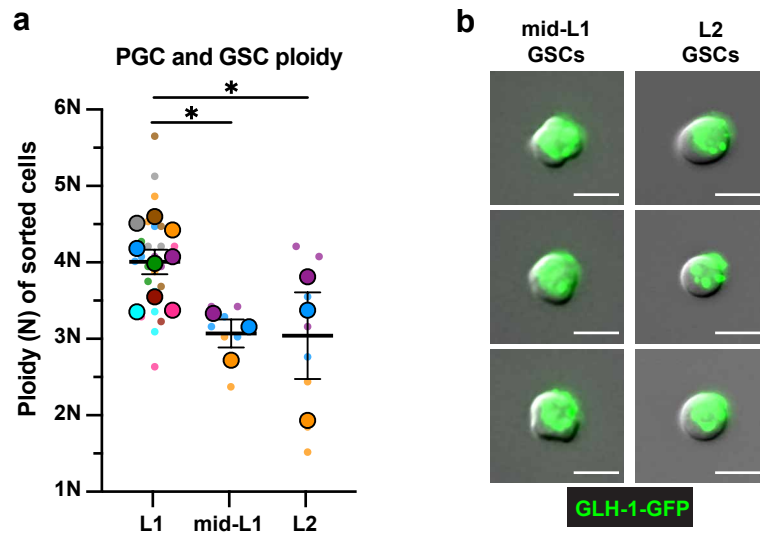

925 **Figure S5. Ploidy and purity of sorted larval GSCs**

926 (a) Ploidy of sorted mid-L1 and L2 GSCs (see Methods). Small dots are three technical  
927 replicates of ddPCR quantification from each of 3-9 color-coded biological replicates; the  
928 technical replicate mean from each experiment is shown as a larger circle, the mean of means  
929 as a horizontal line, and the S.E.M as error bars. \* $p \leq 0.05$ , unpaired two-tailed Student's *t*-test.

930 (b) Representative images of mid-L1 and L2 PGCs post-FACS. Scale bars, 5 $\mu$ m.

931

932

933

934

935

936

937

938

939

940

941

942

943

944

945

946

947

948

949

Figure S6

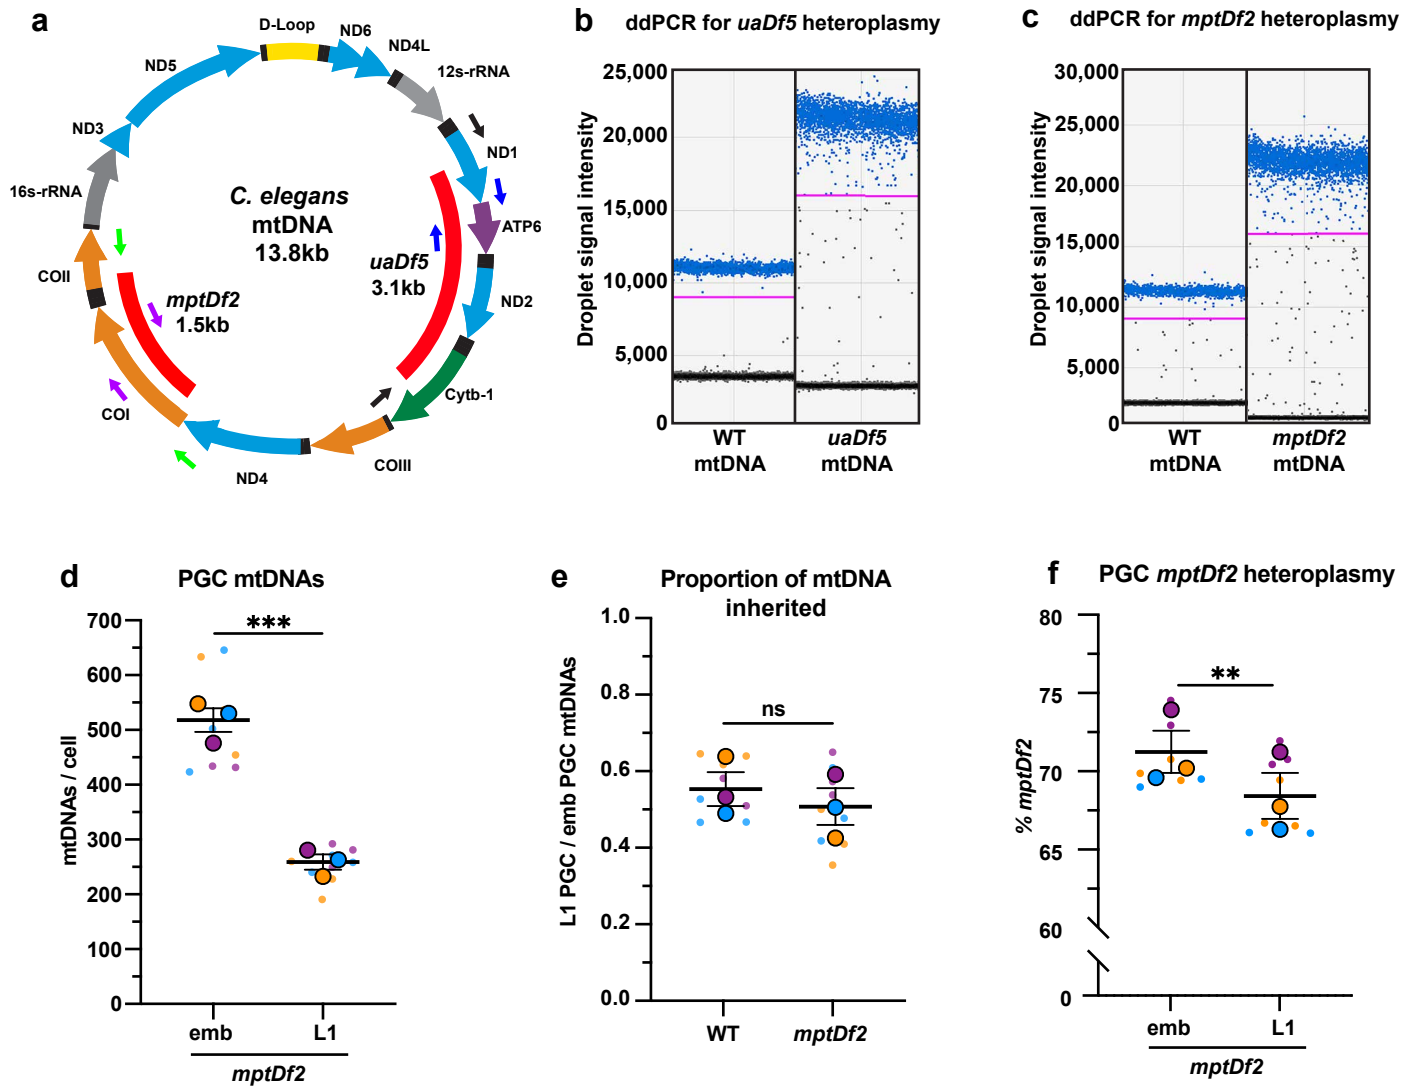

950 **Figure S6. ddPCR primers, detection of mtDNA deletions, and *mptDf2* inheritance in**

951 **PGCs**

952 (a) Schematic of *C. elegans* mtDNA showing mtDNA deletions *uaDf5* and *mptDf2*, as well as  
953 color-coded primer pairs for detecting wild-type and mutant mtDNA by ddPCR. Blue primers,  
954 wild-type mtDNA (*uaDf5* experiments); black primers, *uaDf5* mtDNA; purple primers, wild-type  
955 mtDNA (*mptDf2* experiments); green primers, *mptDf2* mtDNA. (b) Representative ddPCR plot  
956 for quantifying *uaDf5* and WT mtDNA copy number in sorted PGC lysates. (c) Representative  
957 ddPCR plot for quantifying *mptDf2* and WT mtDNA copy number in sorted PGC lysates.  
958 Positive droplets (blue dots), negative droplets (black dots) and threshold for positive droplets  
959 (magenta line) are shown. (d) mtDNA copy number in *mptDf2* embryonic and L1 PGCs (e)  
960 Proportion of *mptDf2* embryonic PGC mtDNAs inherited by L1 PGCs compared to wild type  
961 (from data in d and Fig 2b). (f) *mptDf2* heteroplasmy in embryonic and L1 PGCs. Data in  
962 graphs: small dots are three technical replicates of ddPCR quantification from each of three  
963 color-coded biological replicates; the technical replicate mean from each experiment is shown  
964 as a larger circle, the mean of means as a horizontal line, and the S.E.M as error bars. n.s., not  
965 significant ( $p > 0.05$ ), \*\* $p \leq 0.01$ , \*\*\* $p \leq 0.001$  paired (f) and unpaired (e,d) two-tailed Student's *t*-  
966 test.

967

968

969

970

971

972

973

974

975



**Figure S7**

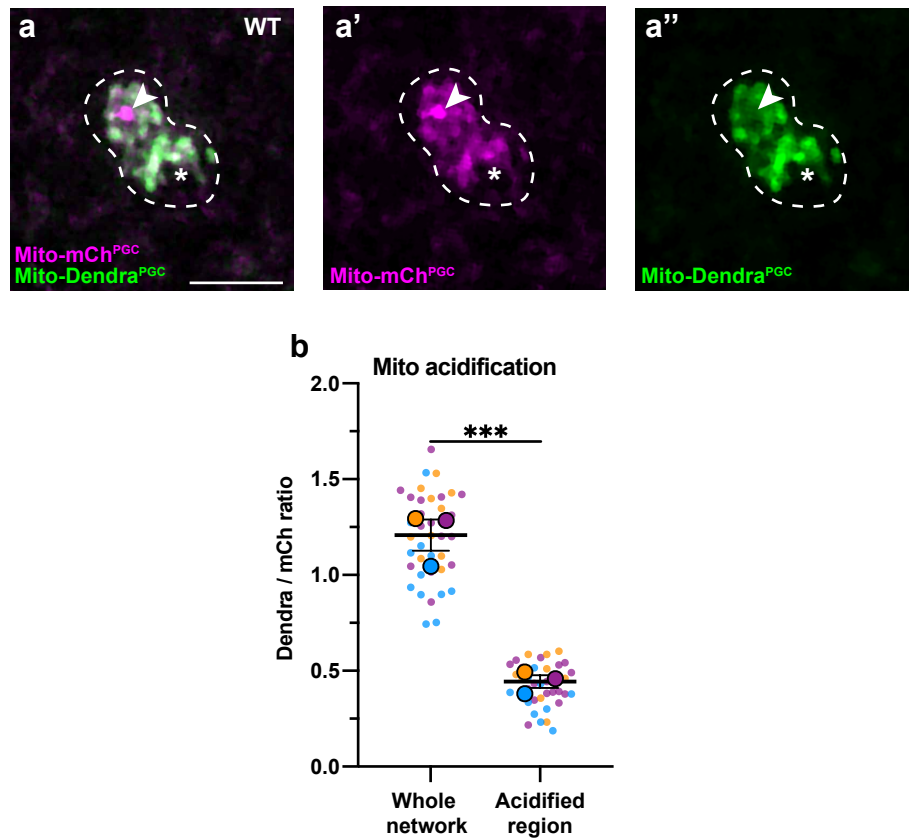

976 **Figure S7. Acidification of a subset of PGC mitochondria**

977 **(a-a'')** Acidified mitochondria (red regions, arrowhead in a, a') in wild-type PGCs. **(b)**

978 Quantification Dendra / mCherry ratio in whole mitochondrial network and in acidified region.

979 Individual data points from three independent color-coded biological replicates are shown as

980 small dots, the mean from each experiment shown as a larger circle, the mean of means as a

981 horizontal line, and the S.E.M as error bars. \*\*\* $p \leq 0.001$ , ratio paired two-tailed Student's *t*-test.

982 Scale bar, 5 $\mu$ m.

983

**Supplemental table 1:**

| <b>C. elegans strains</b>                                                                                                                                                                            | <b>Source</b>                            | <b>Strain Name</b> |
|------------------------------------------------------------------------------------------------------------------------------------------------------------------------------------------------------|------------------------------------------|--------------------|
| <i>C. elegans</i> wild isolate                                                                                                                                                                       | CGC                                      | N2                 |
| <i>atg-18(gk378)</i> V                                                                                                                                                                               | CGC                                      | VC893              |
| <i>atg-13(bp414)</i> III                                                                                                                                                                             | CGC                                      | HZ1688             |
| <i>pdr-1(gk448)</i> III                                                                                                                                                                              | CGC                                      | VC1024             |
| $\Delta$ <i>nop-1</i> (full CRISPR deletion) III                                                                                                                                                     | Heng-Chi Lee, Zhang <i>et al.</i> 2018   | HCL23              |
| <i>glh-1(sam24[glh-1::gfp::3Xflag])</i> I                                                                                                                                                            | Dustin Updike, Marnik <i>et al.</i> 2019 | DUP64              |
| <i>xnSi1[mex-5::GFP::PH::nos-2 3'UTR, unc-119]</i> II ; <i>unc-119(ed3)</i> III                                                                                                                      | Chihara and Nance, 2012                  | FT563              |
| <i>hmg-5(xn107[hmg-5::GFP])</i> IV                                                                                                                                                                   | This study (CRISPR)                      | FT2064             |
| <i>hmg-5(xn107[hmg-5::GFP])</i> IV ; <i>xnIs360 [pMRR08: mex-5p::mCherry-PH::nos-2 3'UTR; unc-119(+)]</i> V                                                                                          | This study                               | FT2067             |
| <i>hmg-5(xn107[hmg-5::GFP])</i> IV ; <i>xnSi45 [pYA11(mex-5p::mCherry-MOMA-1::nos-2 3'UTR; unc-119(+))]</i> II                                                                                       | This study                               | FT2133             |
| <i>xnSi67[pYA57(mex5p:mito(TOMM-20-1-54aa)-Dendra2:nos-2 3'UTR)]</i> I                                                                                                                               | This study (MosSCI)                      | FT1885             |
| <i>xnSi67[pYA57(mex5p:mito(TOMM-20-1-54aa)-Dendra2:nos-2 3'UTR)]</i> I ; <i>xnIs360 [pMRR08: mex-5p::mCherry-PH::nos-2 3'UTR; unc-119(+)]</i> V                                                      | This study                               | FT1900             |
| <i>xnSi67[pYA57(mex5p:mito(TOMM-20-1-54aa)-Dendra2:nos-2 3'UTR)]</i> I ; <i>xnSi45 [pYA11(mex-5p::mCherry-MOMA-1::nos-2 3'UTR; unc-119(+))]</i> II                                                   | This study                               | FT2366             |
| <i>xnSi67[pYA57(mex5p:mito(TOMM-20-1-54aa)-Dendra2:nos-2 3'UTR)]</i> I ; <i>xnSi45 [pYA11(mex-5p::mCherry-MOMA-1::nos-2 3'UTR; unc-119(+))]</i> II ; <i>uaDf5 / + mtDNA</i>                          | This study                               | FT2414             |
| <i>xnSi67[pYA57(mex5p:mito(TOMM-20-1-54aa)-Dendra2:nos-2 3'UTR)]</i> I ; <i>xnSi45 [pYA11(mex-5p::mCherry-MOMA-1::nos-2 3'UTR; unc-119(+))]</i> II ; <i>atg-18(gk378)</i> V ; <i>uaDf5 / + mtDNA</i> | This study                               | FT2417             |
| <i>xnSi73 (pAS07 [mex5p::GFP1-10::nos-2 3'UTR])</i> I ; <i>xnSi45 [pYA11(mex-5p::mCherry-MOMA-1::nos-2 3'UTR)]</i> II                                                                                | This study (CRISPR)                      | FT2128             |
| <i>xnSi85 (mex5p::mito(matrix)-GFP1-10::nos2 3'UTR)</i> I ; <i>xnSi45 [pYA11(mex-5p::mCherry-MOMA-1::nos-2 3'UTR; unc-119(+))]</i> II                                                                | This study (CRISPR)                      | FT2293             |

|                                                                                                                                                                 |                     |        |
|-----------------------------------------------------------------------------------------------------------------------------------------------------------------|---------------------|--------|
| <i>xnSi85 (mex5p::mito(matrix)-GFP1-10::nos2 3'UTR) I ; xnSi45 [pYA11(mex-5p::mCherry-MOMA-1::nos-2 3'UTR; unc-119(+)) II ; hmg-5(xn168[hmg-5-gfp-11]) IV</i>   | This study (CRISPR) | FT2296 |
| <i>glh-1(sam24[glh-1::gfp::3Xflag]) I ; xnls510 [pYA12::ehn-3::mCherry-PH, unc-119(+)] II</i>                                                                   | This study          | FT2279 |
| <i>glh-1(sam24[glh-1::gfp::3Xflag]) I ; xnls510 [pYA12::ehn-3::mCherry-PH, unc-119(+)] II ; uaDf5 / + mtDNA</i>                                                 | This study          | FT2283 |
| <i>glh-1(sam24[glh-1::gfp::3Xflag]) I ; xnls510 [pYA12::ehn-3::mCherry-PH, unc-119(+)] II ; hmg-5(xn168[hmg-5-gfp-11]) IV</i>                                   | This study          | FT2312 |
| <i>glh-1(sam24[glh-1::gfp::3Xflag]) I ; xnls510 [pYA12::ehn-3::mCherry-PH, unc-119(+)] II ; Δnop-1(full CRISPR deletion) III</i>                                | This study          | FT2323 |
| <i>glh-1(sam24[glh-1::gfp::3Xflag]) I ; xnls510 [pYA12::ehn-3::mCherry-PH, unc-119(+)] II ; Δnop-1(full CRISPR deletion) III uaDf5 / + mtDNA</i>                | This study          | FT2332 |
| <i>glh-1(sam24[glh-1::gfp::3Xflag]) I ; xnls510 [pYA12::ehn-3::mCherry-PH, unc-119(+)] II ; atg-18(gk378) V; uaDf5 / + mtDNA</i>                                | This study          | FT2347 |
| <i>glh-1(sam24[glh-1::gfp::3Xflag]) I ; xnls510 [pYA12::ehn-3::mCherry-PH, unc-119(+)] II ; atg-13(bp414) III; uaDf5 / + mtDNA</i>                              | This study          | FT2402 |
| <i>glh-1(sam24[glh-1::gfp::3Xflag]) I ; xnls510 [pYA12::ehn-3::mCherry-PH, unc-119(+)] II ; pdr-1(gk448) III; uaDf5 / + mtDNA</i>                               | This study          | FT2364 |
| <i>glh-1(sam24[glh-1::gfp::3Xflag]) I ; pink-1[xn199(pink-1(STOPIN) , xnls510 [pYA12::ehn-3::mCherry-PH, unc-119(+)] II ; uaDf5 / + mtDNA</i>                   | This study          | FT2432 |
| <i>glh-1(sam24[glh-1::gfp::3Xflag]) I ; pink-1[xn199(pink-1(STOPIN) , xnls510 [pYA12::ehn-3::mCherry-PH, unc-119(+)] II ; pdr-1(gk448) III; uaDf5 / + mtDNA</i> | This study (CRISPR) | FT2378 |
| <i>glh-1(sam24[glh-1::gfp::3Xflag]) I ; xnls510 [pYA12::ehn-3::mCherry-PH, unc-119(+)] II ; mptDf2 / + mtDNA</i>                                                | This study          | FT2387 |
| <i>xnSi67[pYA57(mex5p:mito(TOMM-20-1-54aa)-Dendra2:nos-2 3'UTR) I ; xnSi45 [pYA11(mex-5p::mCherry-MOMA-1::nos-2 3'UTR; unc-119(+)) II</i>                       | This study          | FT2366 |
| <i>xnSi67[pYA57(mex5p:mito(TOMM-20-1-54aa)-Dendra2:nos-2 3'UTR) I ; xnSi45 [pYA11(mex-5p::mCherry-MOMA-1::nos-2 3'UTR; unc-119(+)) II ; uaDf5 / + mtDNA</i>     | This study          | FT2414 |

|                                                                                                                                                                                                                          |            |        |
|--------------------------------------------------------------------------------------------------------------------------------------------------------------------------------------------------------------------------|------------|--------|
| <i>xnSi67</i> [ <i>pYA57(mex5p::mito(TOMM-20-1-54aa)-Dendra2::nos-2 3'UTR)</i> ] I ; <i>xnSi45</i> [ <i>pYA11(mex-5p::mCherry-MOMA-1::nos-2 3'UTR; unc-119(+))</i> ] II ; <i>atg-18(gk378)</i> V; <i>uaDf5</i> / + mtDNA | This study | FT2417 |
|--------------------------------------------------------------------------------------------------------------------------------------------------------------------------------------------------------------------------|------------|--------|

985

986

### Supplemental table 2:

| <i>crRNAs</i>              | target/use                          | sequence             |
|----------------------------|-------------------------------------|----------------------|
| <i>ocrAS hmg-5 C-term</i>  | <i>hmg-5-GFP tagging</i>            | ATCTGCATTTTCTTTCTGTT |
| <i>ocrAS Dendra-C-term</i> | replace Dendra in <i>xnSi67</i>     | GTCCTCTACCAAGTCAAGCA |
| <i>ocrAS Dendra-N-Term</i> | replace Dendra in <i>xnSi67</i>     | AGAATGTCGGACACAATTCT |
| <i>ocrAS01</i>             | add MLS to GFP1-10 in <i>xnSi73</i> | AAGGGAGAAGAATTATTTAC |
| <i>ocrAS13</i>             | <i>hmg-5-GFP11 tagging</i>          | ATCTGCATTTTCTTTCTGTT |
| <i>ocrAS25</i>             | <i>pink-1(stopIN)</i>               | AACTCCTAAATTATAAGTGG |
| <i>ocrAS26</i>             | <i>pink-1(stopIN)</i>               | ATGAACTCCTAAATTATAAG |

987

### Supplemental sequences

989 *hmg-5(xn107[hmg-5-GFP]):*

990

991

992

993

994

995

996

997

998

999

1000

1001

1002

1003

1004

1005

1006

1007

1008

1009

1010

1011

1012

1013

1014

1015

1016

1017

1018

1019

ATGTTGGGAACAATTTCAATGAGATTCTTCGCTACGAAAGTAGTTGCTCCACGTGCTTCTG  
 TCGCAGCTTCAACTCCACAAGTCCCTCTTGAATGAATATCAATCCATACGCAATGTTTCA  
 CAAAGAAAACCTTCAAAGCTAACACTTCCGATATGAAGAGAACTGATTTGATGAAAGAGTTG  
 TCTGGAAAGTGGAAGGCATTGAGTATCTCTGAAAAAGATgtaattataaatatagtttctaaaactaggata  
 ataaattatatttattgcagAAGTACACAGAACTCTCGAAAAATTACAATGCTCAAAGCTGGATGAC  
 TTCATGAACTATCTACTGAGGAACAGAAAAAATTGGTGGATTCTGCAAAGAAAAGAAAAG  
 CGGAAAGAGCAAGTAGACGCCACGCAAAGGAACGCCGTGAAAAAAGGAAGCAATCTGGA  
 CGTCCAAGTGTTCTCCAAGTGCTTATGCACTATTTATCAAAGAGAAGTTGTCTGGAGCTG  
 GAATGGAATCCAAGGAGAAAATGAAAGAAGCTGTTGCTCAATGGAAGGCATTCACTGATT  
 CCCAGAAAAAGgtaatatcagttttcgatttttcgaaaaaaaagctttaaaattaaaaaatatattttgcttattgtgtattctg  
 cacaaaaaaaccaaaccaggcttattgaatagtagagagactcgtataggacttaaggaataaacaaaaacataaagt  
 tcaattacgcatcgactcaatatattttgcttattttcgctctctcataaaaaattgtaggtgtattgtgttcttctcagcaactaaattgata  
 aaaattgagttttcggtataattaaattttcaaaacttattttgattttccggagaatcaaaaaatcgaaatttttcgatgacaccttggtgta  
 ctcgataatatcaaatgattagacagatttatctaggttaatgaatttttagttatcaacaaatcaacaataacgtttaaattaattttaat  
 aattttctttacagAAGTACACAGACGAAGCGAAGAAGCTGAAAGATGAATACCATGTCTGTCCTCC  
 AGAAATGGGAAGCAGAACAAAAAGAAAATGCAGATCAAGGGCCCATGAGTAAAGGAGAA  
 GAACTTTTCACTGGAGTTGTCCCAATTCTTGTGAATTAGATGGTGTGTTAATGGGCACA  
 AATTTTCTGTCAGTGGAGAGGGTGAAGGTGATGCAACATACGGAAAACCTACCCTTAAATT  
 TATTTGCACTACTGGAAAACCTGTTCCATGGgtaagtttaacatataataactaactaaccctgattattta  
 aattttcagCCAACACTTGTCACTACTTTCTgTTATGGTGTTCATGCTTcTCgAGATACCCAGAT  
 CATATGAAACgGCATGACTTTTTCAAGAGTGCCATGCCCGAAGGTTATGTACAGGAAAGAA  
 CTATATTTTTCAAAGATGACGGGAACTACAAGACACgtaagtttaacagttcggactaactaaccatacat  
 atttaaattttcagGTGCTGAAGTCAAGTTTGAAGGTGATACCCTTGTTAATAGAATCGAGTTAAA  
 AGGTATTGATTTTAAAGAAGATGGAAACATTCTTGGACACAAATTGGAATACAACCTATAACT  
 CACACAATGTATACATCATGGCAGACAAACAAAAGAAATGGAATCAAAGTTgtaagtttaacatgat  
 ttactaactaactaatctgatttaaattttcagAACTTCAAATTAGACACAACATTGAAGATGGAAGCGTTC  
 AACTAGCAGACCATTATCAACAAAATACTCCAATTGGCGATGGCCCTGTCCTTTTACCAGA  
 CAACCATTACCTGTCCACACAATCTGCCCTTTCGAAAGATCCCAACGAAAAGAGAGACCA  
 CATGGTCTTCTTGAGTTTGTAAACAGCTGCTGGGATTACACATGGCATGGATGAACTATAC

1020 **AAATAG**ttgaattcgtcacaactttccattttgtaatacaatatacacttttcgattcatgacacttttctcaactaccttctctcaaatgttt  
1021 cggttttatgtaaaatttatcgatccc

1022  
1023  
1024 *hmg-5(xn168[hmg-5-GFP11]):*

1025  
1026 ATGTTGGGAACAATTTCAATGAGATTCTTCGCTACGAAAGTAGTTGCTCCACGTGCTTCTG  
1027 TCGCAGCTTCAACTCCACAAGTCCCTCTTGGAAATGAATATCAATCCATACGCAATGTTTCA  
1028 CAAAGAAAACCTTCAAAGCTAACACTTCCGATATGAAGAGAACTGATTTGATGAAAGAGTTG  
1029 TCTGGAAAGTGGAAGGCATTGAGTATCTCTGAAAAAGATgtaattataaatatagtttctaaaactaggata  
1030 ataaattatatttattgcagAAGTACACAGAACTCTCGAAAAATTACAATGCTCAAAGCTGGATGAC  
1031 TTCATGAAACTATCTACTGAGGAACAGAAAAAATTGGTGGATTCTGCAAAGAAAAGAAAAG  
1032 CGGAAAGAGCAAGTAGACGCCACGCAAAGGAACGCCGTGAAAAAAGGAAGCAATCTGGA  
1033 CGTCCAAGTGTTCTCCAAGTGCTTATGCACTATTTATCAAAGAGAAGTTGTCTGGAGCTG  
1034 GAATGGAATCCAAGGAGAAAATGAAAGAAGCTGTTGCTCAATGGAAGGCATTCACTGATT  
1035 CCCAGAAAAAGtaatatcagttttcgattttcgaaaaaaaaagctttaaataaaaaaatattttgcttattgttattctg  
1036 cacaaaaaaaaaccaaaaccaaggctttattgaatagtagagagactcgtataggacttaaggaataaacaaaaacataaagt  
1037 tcaattacgcatcgactcaatataattttgcttattttcgcttctcataaaaaattgtaggtgtattgtgtctttctcagcaactaaattgata  
1038 aaaattgagttttcgttataataaaatttcaaacttatttttgattttccggagaatcaaaaaatcgaatttttcgatgacacctttgta  
1039 ctcgataaatcaaatgattagacagtatttatctaggttaatgaatttttagttatcaacaaattcaacaataacgtttaaattaattttaa  
1040 aattttctttacagAAGTACACAGACGAAGCGAAGAAGCTGAAAGATGAATACCATGTCGTCCTCC  
1041 AGAAATGGGAAGCAGAACAAAAGAAAATGCAGATCAAGGAGGTTCCAGGAGGA**CGTGAC**  
1042 **CACATGGTCTCCATGAGTATGTCAATGCCGCCGGAATCACC****TAG**ttgaattcgtcacaactttccattt  
1043 tgtaatcaaa

1044  
1045 *pink-1(xn199[pink-1(STOPIN)]):*

1046  
1047 ATGTCTATGAAACGATTTCGGAAAAGCAGCATATCGAATCGCAAATGAGGtatcttcaaaatcgttcttt  
1048 ttataatcgttaaattgaaatttttagTTAGTTGCAAAGGTGGACGACTACCAATTTTCCAACGCTTCC  
1049 TGCCGAGAATATTTCCCGCCACTTA**GGAGCATCGGGAGCCTCAGGAGCATCGGGAGGTT**  
1050 **CAGGAGGAGGGAAGTTTGTCCAGAGCAGAGGTGACTAAGTGATAAGCTAGC**TAATTTAG  
1051 GAGTTCATGTGCTACTCAAAAAGGCTCCATTTCCACGACAAAATGCTCTACGAATTgtaagttt  
1052 atgaaaattcaacaaaaaaaaaattaaattgaattcctttcagGCTCGCCTTGTAACCTCGCCACGGTTCGAGTTT  
1053 TCCGGCCATTTTCTCAGTAATAATCGAAAGACATCGATTTCAAATCAAATGATTGGCG  
1054 TCGAAAGTTTCAACCGATTTCGTAAAGAATTGCCAAGAAATGTGGATTTAGTCGAACGAATC  
1055 AGGCAGATATTTGGCAATTCTCTACGATACAATGAGGATTTGAAAAGCACTGAATGGCCG  
1056 AATAGAATTGATTCTTATGAGTTTggtatgctttttcagtgatatttctccattgtttgagttttcagGGGAATTTCTC  
1057 GGTCAAGGATGCAATGCAGCAGTTTACTCTGCGAGATTAGCCAATTCTGATGCAGAATCC  
1058 TCAGGGAATACTCACTATGGTGCAGGGTTTAATGAAGTCACAAATATACTTGCAGAAATTC  
1059 CGCCAGTTAGCAAAGTTGCACAAAAGgtagttgataatcttaattcgtatgattaatattgaaaaatcattgcagAAA  
1060 TTCCCGTTGGCAATCAAATTAATGTTTAATTTTGAACATGATCGCGATGGAGATGCTCATC  
1061 TCTTGAAATCAATGGGAAATGAATTGGCTCCATATCCGAATGCTGCAAAGTTGCTCAATGG  
1062 ACAAATGGGAACATTTAGACCTCTTCCAGCAAACATCCAATGTTGTTTGAATTCAGACA  
1063 GCTTTTATTGATTCGTTAAAAGTTTTGCCAGATGCGATTGAACGgttagctttgaaatttattgataatgat  
1064 tgagaataagattttccagATATCCAGATGCCCTTCACTGCACGTTGGTATGAGTCAATTGCCTC  
1065 CGAACCAGAAAACAATGTACGTAGTAATGAGACGATACCGACAAACACTTTCATGAATATGTA  
1066 TGGACTCGTCATCGAAATTATTGGACAGGACGAGTGATAATTGCTCACTATTAGAAGCAT  
1067 GTACATATCTTCATAAGCATAAAGTTGCTCAGCGAGACATGAAAAGTGATAATATTCTTCT  
1068 GGAATATGATTTTACGACGAGATTCCCAATTAGTTGTCGCCGATTTTGGATGTGCACTT  
1069 GCATGTGACAATTGGCAAGTAGACTATGAATCAGATGAAGTTAGTCTTGGAGGAAATGCC  
1070 AAGACAAAAGCACCAAGAAATTGCGACGGCTGTTCTTGAAAGAATGTgtagttttgaaagtttagagt

1071 actgtatataatcaaagtttttacagAAAAGTAACTTCGAAATGGCAGATACATGGGCAGCTGGAGGC  
1072 CTTTCTTATGAAGTTCTAACACGATCAAATCCATTCTACAACTTCTTGATACTGCAACATA  
1073 CCAGGAATCAGAACTACCAGCACTCCCATCTCGTGTCAATTTTGTGGCACGAGATGTCAT  
1074 TTTTGACCTACTCAAGCGAGATCCTAATGAAAGAGTCAAGCCGAATATTGCTGCAAATGC  
1075 GTTGAATTTGTCATTGTTTCAAGATGGGAGAAGATGTGAAGCAGATGATGGAAAAATGTGG  
1076 AATATCTCAAATGACTACTCTATTGGCTGGAAGTTCTAAAGTTTTGAGTCAAAAAATCAATA  
1077 GTCGTCTGGACAAAGTGATGAATCTGATTACTGCTGAACTATCATGGCCAACCTAGCTC  
1078 CACATTTGATTAGTCGAGCAGAACGACAACCTTCGAGCAACATTTCTTTCAAGAATGAATCG  
1079 AGAAGATATTTGGAGAAGTCTTCAATATTTCTTCCAGCTGGTGTCAACTTGACACACCT  
1080 GCCACATCATCAGACTGTTTGGAGACTATTTCCAGTTTGATGTCGAGTTTTTCAAATGATT  
1081 CAGAAAATTACGAGAAGCAACAGAAACCGGCTAAAAATGGATACAACAATGTTCCACTTCT  
1082 TCTCAGAAATGTTATCCGTACAGATGCGGATGGAATCAATGGAATTGTACATAGAGTTCTGA  
1083 TCTAAATAG

1084  
1085 GFP(1-10):

1086  
1087 ATGTCTAAGGGAGAAGAATTATTTACTGGAGTTGTTCTATCCTCGTCGAGCTCGACGGA  
1088 GACGTCAACGGACACAAGTTCTCCGTCCGTGGAGAGGGAGAGGGAGACGCCACCATTG  
1089 GAAAGCTCACCTCAAGTTCATCTGCACCACCGGAAAGCTCCCAGTCCCATGGCCAACC  
1090 CTCGTCAACACCCTCACCTACGGAGTCCAATGCTTCTCCCGTTACCCAGACCACATGAAG  
1091 AGACACGACTTCTTCAAGTCCGCCATGCCAGAGGGATACGTCCAAGAGCGTACCATCTCC  
1092 TCAAGgtaagtttaacatatataactaactaacctgattatthaaatthtcagGACGACGGAAAATACAAGACC  
1093 GTGCCGTTGTCAAGTTCGAGGGAGACACCCTCGTCAACCGTATCGAGCTCAAGgtaagttta  
1094 acagttcggtaactaactaaccatacatatthaaatthtcagGGAACAGACTTCAAGGAGGACGGAAACATCCTC  
1095 GGACACAAGCTCGAGTACAACCTCAACTCCCACAACGTCTACATCACCGCCGACAAGCAA  
1096 AAGAACGGAATCAAGGCCAACTTCAAGtaagtttaacatatataactaactaactaactatctgataataatthtcag  
1097 GTTCGTCAACAACGTGAGGACGGATCCGTCCAACCTCGCCGACCACTACCAACAAAACAC  
1098 CCAATCGGAGACGGACCAGTCTCCTCCAGACAACCACTACCTCTCCACCCAAACAGT  
1099 TCTCTCAAGGACCCAAACGAGAAGTAA

1100  
1101 mitoGFP(1-10):

1102  
1103 ATGGCACTCCTGCAATCACGTCTCCTCCTGTCCGCCCCACGTCGTGCCGCCGCCACCGC  
1104 CCGTGCCGGAGCTGGTGCAGGCGCTGGAGCCGGAGCCATGTCTAAGGGAGAAGAAGTCT  
1105 TTCACTGGAGTTGTTCTATCCTCGTCGAGCTCGACGGAGACGTCAACGGACACAAGTTC  
1106 TCCGTCCGTGGAGAGGGAGAGGGAGACGCCACCATTGGAAAGCTCACCTCAAGTTCAT  
1107 CTGCACCACCGGAAAGCTCCCAGTCCCATGGCCAACCTCGTCACCACCCTCACCTACG  
1108 GAGTCCAATGCTTCTCCCGTTACCCAGACCACATGAAGAGACACGACTTCTTCAAGTCCG  
1109 CCATGCCAGAGGGATACGTCCAAGAGCGTACCATCTCCTTCAAGgtaagtttaacatatataacta  
1110 actaacctgattatthaaatthtcagGACGACGGAAAATACAAGACCCGTGCCGTTGTCAAGTTCGAGG  
1111 GAGACACCCTCGTCAACCGTATCGAGCTCAAGgtaagtttaacagttcggtaactaactaaccatacatatth  
1112 aatthtcagGGAACAGACTTCAAGGAGGACGGAAACATCCTCGGACACAAGCTCGAGTACAAC  
1113 TTCAACTCCCACAACGTCTACATCACCGCCGACAAGCAAAGAACGGAATCAAGGCCAAC  
1114 TTCACAgtaagtttaacatatataactaactaactaactatctgataataatthtcagGTTTCGTCAACAACGTGAGGAC  
1115 GGATCCGTCCAACCTCGCCGACCACTACCAACAAAACACCCCAATCGGAGACGGACCAGT  
1116 CCTCCTCCAGACAACCACTACCTCTCCACCCAAACAGTTCTCTCAAGGACCCAAACGA  
1117 GAAGTAA

1118  
1119 tomm-20(1-54aa)-Dendra2:

1120



1121 ATGTCGGACACAATTCTTGGTTTCAACAAATCAAACGTCGTTTTGGCTGCTGGAATTGCTG  
1122 GAGCCGCTTTCCTCGGCTACTGCATTTACTTCGATCATAAGAGAATCAACGCTCCAGACT  
1123 ACAAGGACAAGATTAGGCAAAGAGACGTGCCAGGCTGGAAACCCAGCTTTCTTGAC  
1124 GGATCCATGAACCTTATTAAGGAAGATATGAGAGTCAAAGTTCATATGGAAGGAAACGTC  
1125 AACGGTCATGCATTTGTTATTGAAGGAGAAGGAAAAGGAAAGCCATACGAAGGAACTCAA  
1126 ACTGCAAACCTTGACTGTCAAAGAAGGAGCACCCTACCATTTAGTTACgtaagttaaacatatata  
1127 actaactaacctgattatttaaatttcagGATATTCTAACTACTGCCGTCCATTACGGAAACAGAGTTTT  
1128 TACTAAATACCCAGAAGATATTCCTGATTACTTCAAGCAATCGTTTCCAGAAGGATACTCG  
1129 TGGGAAAGAACTATGACTTTCGAAGATAAAGGTATTTGCACTATTgtaagttaaacagttcggtacta  
1130 actaaccatacatatttaaatttcagAGAAGTGATATTAGTCTAGAAGGTGATTGCTTCTTCCAAAATGT  
1131 CAGATTTAAAGGAACTAACTTTCCTCCTAACGGACCAGTTATGCAAAGAAGACTCTTAAG  
1132 TGGGAACCATCGACTGAAAACCTACATGTTAGAGATGGACTACTTGTGGAgtaagttaaacttg  
1133 gacttactaactaacggattatatttaaatttcagAACATTAACATGGCACTACTACTAGAAGGTGGAGGTC  
1134 ACTACCTTTGCGATTTTAAAACCTTACAAAGCAAAGAAGGTTCGTTCCAACTTCCAGATGC  
1135 ACACTTTGTTGATCACAGAATTGAAATACTAGGAAACGATTTCGGATTACAACAAAGTTAAG  
1136 CTATACGAACACGCAGTTGCAAGATACAGTCCTCTACCAAGTCAAGCATGGTAA

1137

1138

1139

1140

1141

1142

1143

1144

1145

1146

1147

1148

1149

1150

1151

1152

1153

1154

1155 **References**

- 1156 1. Fu, Y., M. Tigano, and A. Sfeir, *Safeguarding mitochondrial genomes in higher*  
1157 *eukaryotes*. Nat Struct Mol Biol, 2020. **27**(8): p. 687-695.
- 1158 2. Gorman, G.S., et al., *Prevalence of nuclear and mitochondrial DNA mutations related to*  
1159 *adult mitochondrial disease*. Ann Neurol, 2015. **77**(5): p. 753-9.
- 1160 3. Palozzi, J.M., S.P. Jeedigunta, and T.R. Hurd, *Mitochondrial DNA Purifying Selection in*  
1161 *Mammals and Invertebrates*. J Mol Biol, 2018. **430**(24): p. 4834-4848.
- 1162 4. Muller, H.J., *The relation of recombination to mutational advance*. Mutation  
1163 Research/Fundamental and molecular mechanisms of mutagenesis, 1967. **1**(1): p. 2-9.
- 1164 5. Nachman, M.W., *Deleterious mutations in animal mitochondrial DNA*. Mutation and  
1165 Evolution, 1998: p. 61-69.
- 1166 6. Hauswirth, W.W. and P.J. Laipis, *Mitochondrial DNA polymorphism in a maternal*  
1167 *lineage of holstein cows*. Proceedings of the National Academy of Sciences, 1982. **79**:  
1168 p. 4686-4690.
- 1169 7. Olivo, P.D., et al., *Nucleotide sequence evidence for rapid genotypic shifts in the*  
1170 *bovine mitochondrial DNA D-loop*. Nature, 1983. **306**: p. 400-402.
- 1171 8. Cao, L., et al., *The mitochondrial bottleneck occurs without reduction of mtDNA content*  
1172 *in female mouse germ cells*. Nat Genet, 2007. **39**(3): p. 386-90.
- 1173 9. Cree, L.M., et al., *A reduction of mitochondrial DNA molecules during embryogenesis*  
1174 *explains the rapid segregation of genotypes*. Nat Genet, 2008. **40**(2): p. 249-54.
- 1175 10. Floros, V.I., et al., *Segregation of mitochondrial DNA heteroplasmy through a*  
1176 *developmental genetic bottleneck in human embryos*. Nat Cell Biol, 2018. **20**(2): p. 144-  
1177 151.

- 1178 11. Jenuth, J.P., et al., *Random genetic drift in the female germline explains the rapid*  
1179 *segregation of mammalian mitochondrial DNA*. Nature Genetics, 1996. **14**(2): p. 146-  
1180 151.
- 1181 12. Otten, A.B., et al., *Differences in Strength and Timing of the mtDNA Bottleneck between*  
1182 *Zebrafish Germline and Non-germline Cells*. Cell Rep, 2016. **16**(3): p. 622-30.
- 1183 13. Wai, T., D. Teoli, and E.A. Shoubridge, *The mitochondrial DNA genetic bottleneck*  
1184 *results from replication of a subpopulation of genomes*. Nat Genet, 2008. **40**(12): p.  
1185 1484-8.
- 1186 14. Chen, Z., et al., *Mitochondrial DNA segregation and replication restrict the transmission*  
1187 *of detrimental mutation*. J Cell Biol, 2020. **219**(7).
- 1188 15. Lieber, T., et al., *Mitochondrial fragmentation drives selective removal of deleterious*  
1189 *mtDNA in the germline*. Nature, 2019. **570**(7761): p. 380-384.
- 1190 16. Zhang, Y., et al., *PINK1 Inhibits Local Protein Synthesis to Limit Transmission of*  
1191 *Deleterious Mitochondrial DNA Mutations*. Mol Cell, 2019. **73**(6): p. 1127-1137 e5.
- 1192 17. Hill, J.H., Z. Chen, and H. Xu, *Selective propagation of functional mitochondrial DNA*  
1193 *during oogenesis restricts the transmission of a deleterious mitochondrial variant*. Nat  
1194 Genet, 2014. **46**(4): p. 389-92.
- 1195 18. Ma, H., H. Xu, and P.H. O'Farrell, *Transmission of mitochondrial mutations and action of*  
1196 *purifying selection in Drosophila melanogaster*. Nat Genet, 2014. **46**(4): p. 393-7.
- 1197 19. Fukuyama, M., A.E. Rougvie, and J.H. Rothman, *C. elegans DAF-18/PTEN mediates*  
1198 *nutrient-dependent arrest of cell cycle and growth in the germline*. Curr Biol, 2006.  
1199 **16**(8): p. 773-9.
- 1200 20. Abdu, Y., et al., *Developmentally programmed germ cell remodelling by endodermal cell*  
1201 *cannibalism*. Nature Cell Biology, 2016.

- 1202 21. Sulston, J.E., et al., *The embryonic cell lineage of the nematode Caenorhabditis*  
1203 *elegans*. Dev Biol, 1983. **100**: p. 64-119.
- 1204 22. Chudakov, D.M., S. Lukyanov, and K.A. Lukyanov, *Tracking intracellular protein*  
1205 *movements using photoswitchable fluorescent proteins PS-CFP2 and Dendra2*. Nat  
1206 Protoc, 2007. **2**(8): p. 2024-32.
- 1207 23. Shaner, N.C., et al., *Improved monomeric red, orange and yellow fluorescent proteins*  
1208 *derived from Discosoma sp. red fluorescent protein*. Nat Biotechnol, 2004. **22**(12): p.  
1209 1567-72.
- 1210 24. Garrido, N., et al., *Composition and Dynamics of Human Mitochondrial Nucleoids*.  
1211 Molecular biology of the cell, 2003. **14**: p. 1583-1596.
- 1212 25. Lewis, S.C., L.F. Uchiyama, and J. Nunnari, *ER-mitochondria contacts couple mtDNA*  
1213 *synthesis with mitochondrial division in human cells*. Science, 2016. **353**(6296): p.  
1214 aaf5549.
- 1215 26. Rajala, N., et al., *Replication factors transiently associate with mtDNA at the*  
1216 *mitochondrial inner membrane to facilitate replication*. Nucleic Acids Res, 2014. **42**(2):  
1217 p. 952-67.
- 1218 27. Brown, T.A., et al., *Superresolution fluorescence imaging of mitochondrial nucleoids*  
1219 *reveals their spatial range, limits, and membrane interaction*. Mol Cell Biol, 2011.  
1220 **31**(24): p. 4994-5010.
- 1221 28. Kukat, C., et al., *Super-resolution microscopy reveals that mammalian mitochondrial*  
1222 *nucleoids have a uniform size and frequently contain a single copy of mtDNA*. Proc Natl  
1223 Acad Sci U S A, 2011. **108**(33): p. 13534-9.
- 1224 29. Yang, Q., et al., *LONP-1 and ATFS-1 sustain deleterious heteroplasmy by promoting*  
1225 *mtDNA replication in dysfunctional mitochondria*. Nat Cell Biol, 2022. **24**(2): p. 181-193.

- 1226 30. Maniscalco, C., A.E. Hall, and J. Nance, *An interphase contractile ring reshapes*  
1227 *primordial germ cells to allow bulk cytoplasmic remodeling*. J Cell Biol, 2020. **219**(2).
- 1228 31. Larsson, N., et al., *Mitochondrial transcription factor A is necessary for mtDNA*  
1229 *maintenance and embryogenesis in mice*. Nature, 1998. **18**: p. 231-236.
- 1230 32. Sumitani, M., et al., *Biochemical properties of Caenorhabditis elegans HMG-5, a*  
1231 *regulator of mitochondrial DNA*. J Biochem, 2011. **149**(5): p. 581-9.
- 1232 33. Hubbard, E.J.A. and T. Schedl, *Biology of the Caenorhabditis elegans Germline Stem*  
1233 *Cell System*. Genetics, 2019. **213**(4): p. 1145-1188.
- 1234 34. Bratic, I., et al., *Mitochondrial DNA level, but not active replicase, is essential for*  
1235 *Caenorhabditis elegans development*. Nucleic Acids Res, 2009. **37**(6): p. 1817-28.
- 1236 35. Tsang, W.Y. and B.D. Lemire, *Mitochondrial genome content is regulated during*  
1237 *nematode development*. Biochem Biophys Res Commun, 2002. **291**(1): p. 8-16.
- 1238 36. Cabantous, S., T.C. Terwilliger, and G.S. Waldo, *Protein tagging and detection with*  
1239 *engineered self-assembling fragments of green fluorescent protein*. Nat Biotechnol,  
1240 2005. **23**(1): p. 102-7.
- 1241 37. Kamiyama, D., et al., *Versatile protein tagging in cells with split fluorescent protein*. Nat  
1242 Commun, 2016. **7**: p. 11046.
- 1243 38. Tsang, W.Y. and B.D. Lemire, *Stable heteroplasmy but differential inheritance of a large*  
1244 *mitochondrial DNA deletion in nematodes*. Biochem Cell Biol, 2002. **80**(5): p. 645-54.
- 1245 39. Gitschlag, B.L., et al., *Homeostatic Responses Regulate Selfish Mitochondrial Genome*  
1246 *Dynamics in C. elegans*. Cell Metab, 2016. **24**(1): p. 91-103.
- 1247 40. Gitschlag, B.L., A.T. Tate, and M.R. Patel, *Nutrient status shapes selfish mitochondrial*  
1248 *genome dynamics across different levels of selection*. Elife, 2020. **9**.

- 1249 41. Lin, Y.F., et al., *Maintenance and propagation of a deleterious mitochondrial genome by*  
1250 *the mitochondrial unfolded protein response*. Nature, 2016. **533**(7603): p. 416-9.
- 1251 42. Dikic, I. and Z. Elazar, *Mechanism and medical implications of mammalian autophagy*.  
1252 Nat Rev Mol Cell Biol, 2018. **19**(6): p. 349-364.
- 1253 43. Palmisano, N.J. and A. Melendez, *Autophagy in C. elegans development*. Dev Biol,  
1254 2019. **447**(1): p. 103-125.
- 1255 44. Tian, E., et al., *epg-1 functions in autophagy-regulated processes and may encode a*  
1256 *highly divergent Atg13 homolog in C. elegans*. Autophagy, 2009. **5**(5): p. 608-15.
- 1257 45. Hammerling, B.C., et al., *A Rab5 endosomal pathway mediates Parkin-dependent*  
1258 *mitochondrial clearance*. Nat Commun, 2017. **8**: p. 14050.
- 1259 46. McLelland, G.L., et al., *Parkin and PINK1 function in a vesicular trafficking pathway*  
1260 *regulating mitochondrial quality control*. EMBO J, 2014. **33**(4): p. 282-95.
- 1261 47. Palikaras, K., E. Lionaki, and N. Tavernarakis, *Mechanisms of mitophagy in cellular*  
1262 *homeostasis, physiology and pathology*. Nat Cell Biol, 2018. **20**(9): p. 1013-1022.
- 1263 48. Ahier, A., et al., *PINK1 and parkin shape the organism-wide distribution of a deleterious*  
1264 *mitochondrial genome*. Cell Rep, 2021. **35**(9): p. 109203.
- 1265 49. Bess, A.S., et al., *Mitochondrial dynamics and autophagy aid in removal of persistent*  
1266 *mitochondrial DNA damage in Caenorhabditis elegans*. Nucleic Acids Res, 2012.  
1267 **40**(16): p. 7916-31.
- 1268 50. Kandul, N.P., et al., *Selective removal of deletion-bearing mitochondrial DNA in*  
1269 *heteroplasmic Drosophila*. Nat Commun, 2016. **7**: p. 13100.
- 1270 51. Ahier, A., et al., *Affinity purification of cell-specific mitochondria from whole animals*  
1271 *resolves patterns of genetic mosaicism*. Nat Cell Biol, 2018. **20**(3): p. 352-360.

- 1272 52. Brenner, S., *The Genetics of Caenorhabditis elegans*. Genetics, 1974. **77**: p. 71-94.
- 1273 53. Lee, C.S., T. Lu, and G. Seydoux, *Nanos promotes epigenetic reprogramming of the*  
1274 *germline by down-regulation of the THAP transcription factor LIN-15B*. Elife, 2017. **6**.
- 1275 54. Strange, K., M. Christensen, and R. Morrison, *Primary culture of Caenorhabditis*  
1276 *elegans developing embryo cells for electrophysiological, cell biological and molecular*  
1277 *studies*. Nat Protoc, 2007. **2**(4): p. 1003-12.
- 1278 55. Marnik, E.A., et al., *Germline Maintenance Through the Multifaceted Activities of*  
1279 *GLH/Vasa in Caenorhabditis elegans P Granules*. Genetics, 2019. **213**(3): p. 923-939.
- 1280 56. McIntyre, D.C. and J. Nance, *Niche Cell Wrapping Ensures Primordial Germ Cell*  
1281 *Quiescence and Protection from Intercellular Cannibalism*. Current Biology, 2020. **30**(4):  
1282 p. 708-714.e4.
- 1283 57. Fox, P.M., et al., *Cyclin E and CDK-2 regulate proliferative cell fate and cell cycle*  
1284 *progression in the C. elegans germline*. Development, 2011. **138**(11): p. 2223-34.
- 1285 58. Chihara, D. and J. Nance, *An E-cadherin-mediated hitchhiking mechanism for C.*  
1286 *elegans germ cell internalization during gastrulation*. Development, 2012. **139**(14): p.  
1287 2547-56.
- 1288 59. Gibson, D.G., et al., *Enzymatic assembly of DNA molecules up to several hundred*  
1289 *kilobases*. Nat Methods, 2009. **6**(5): p. 343-5.
- 1290 60. Dickinson, D.J., et al., *Engineering the Caenorhabditis elegans genome using Cas9-*  
1291 *triggered homologous recombination*. Nat Methods, 2013. **10**(10): p. 1028-34.
- 1292 61. Frokjaer-Jensen, C., et al., *Single-copy insertion of transgenes in Caenorhabditis*  
1293 *elegans*. Nat Genet, 2008. **40**(11): p. 1375-83.

- 1294 62. Paix, A., A. Folkmann, and G. Seydoux, *Precision genome editing using CRISPR-Cas9*  
1295 *and linear repair templates in C. elegans*. *Methods*, 2017. **121-122**: p. 86-93.
- 1296 63. Wang, H., et al., *An Efficient Genome Editing Strategy To Generate Putative Null*  
1297 *Mutants in Caenorhabditis elegans Using CRISPR/Cas9*. *G3 (Bethesda)*, 2018. **8(11)**:  
1298 p. 3607-3616.
- 1299 64. Lord, S.J., et al., *SuperPlots: Communicating reproducibility and variability in cell*  
1300 *biology*. *J Cell Biol*, 2020. **219(6)**.
- 1301 65. Armstrong, R.A., *When to use the Bonferroni correction*. *Ophthalmic Physiol Opt*, 2014.  
1302 **34(5)**: p. 502-8.

1303

1304

1305

1306

1307

1308
